# Supplementary material for: Proteomic profiling of the rat hippocampus from the kindling and pilocarpine models of epilepsy: potential targets in calcium regulatory network
Source: PubMed Central journal article supplement (PMC8050094; doi:10.1038/s41598-021-87555-7), 2021-04-15
Supplement: 41598_2021_87555_MOESM1_ESM.pdf [file 41598_2021_87555_MOESM1_ESM.pdf]

## SUPPORTING INFORMATION

### **Proteomic profiling of the rat hippocampus from the kindling and pilocarpine models of epilepsy: Potential targets in calcium regulatory network**

Leila Sadeghi<sup>1,2</sup>, Albert Anatolyevich Rizvanov<sup>3</sup>, Bahareh Dabirmanesh<sup>1</sup>, Inur Ildusovich Salafutdinov<sup>3</sup>, Mohammad Sayyah<sup>4</sup>, Amir Shojaei<sup>5</sup>, Javad Zahiri<sup>6</sup>, Javad Mirnajafi-Zadeh<sup>5</sup>, Babak Khorsand<sup>7</sup>, Khosro Khajeh\*<sup>1</sup>, Yaghoub Fathollahi\*<sup>5</sup>

<sup>1</sup>Department of Biochemistry, Faculty of Biological Science, Tarbiat Modares University, Tehran, Iran.

<sup>2</sup>Department of Animal Biology, Faculty of Natural Science, Tabriz University, Tabriz, Iran

<sup>3</sup>Department of Genetics, Kazan Federal University, Kazan, Russian Federation.

<sup>4</sup>Department of Physiology and Pharmacology, Pasteur Institute of Iran, Tehran, Iran.

<sup>5</sup>Department of Medical Physiology, Faculty of Medical Science, Tarbiat Modares University, Tehran, Iran.

<sup>6</sup>Department of Biophysics, Faculty of Biological Science, Tarbiat Modares University, Tehran, Iran.

<sup>7</sup>Department of Computer Engineering, Faculty of Engineering, Ferdowsi University of Mashhad, Mashhad, Iran

**Short title: Hippocampus proteome, calcium homeostasis and seizures**

Table S-1: The list of proteins that showed different expression exclusively in PTZ kindling model in comparison with control hippocampus.

| Row no. | Spot number | Match ID | Name                                                      | Fold change | pI/Mw         | Accession no | Score | Function                                                                                                                                                                                                                                                                                                                                                                                                               |
|---------|-------------|----------|-----------------------------------------------------------|-------------|---------------|--------------|-------|------------------------------------------------------------------------------------------------------------------------------------------------------------------------------------------------------------------------------------------------------------------------------------------------------------------------------------------------------------------------------------------------------------------------|
| 1       | 111         | 920      | Myosin Light Chain 4                                      | +3.4        | 4.96/21.2     | P17209       | 98    | Calcium ion binding protein                                                                                                                                                                                                                                                                                                                                                                                            |
| 2       | 107         | 8100     | Stathmin-4                                                | +2.5        | 5.76/22       | P63043       | 124   | Stathmin interacts with two molecules of dimeric $\alpha,\beta$ -tubulin to form a tight ternary complex called the T2S complex. Mice without stathmin have deficiency in innate and learned fear. They lack motivation for retrieving pups and are unable to choose a safe location for nest-building.                                                                                                                |
| 3       | 29          | 7621     | GTP-Binding Protein Rheb                                  | +2.3        | 5.65/20.4     | Q62639       | 85    | Activates the protein kinase activity of mTORC1, and thereby plays a role in the regulation of apoptosis.                                                                                                                                                                                                                                                                                                              |
| 4       | 96          | 862      | Transmembrane Emp24 Domain-Containing Protein 2           | +2.5        | 5.08/22.7     | Q63524       | 93    | Involved in vesicular protein trafficking. Mainly functions in the early secretory pathway but also in post-Golgi membranes.                                                                                                                                                                                                                                                                                           |
| 5       | 117         | 778      | Phosphoserine phosphatase                                 | +3.2        | 5.47/24.9     | Q5M819       | 134   | Catalyzes the last step in the biosynthesis of serine from carbohydrates. The reaction mechanism proceeds via the formation of a phosphoryl-enzyme intermediates                                                                                                                                                                                                                                                       |
| 6       | 110         | 248      | Dynamin-2 (DNM2)                                          | -3.1        | 7.02/98.2     | P39052       | 90    | High expression of this protein may be manifested increasing of the neurotransmitters (excitatory) releasing in epileptic models. The behavioral study revealed that inhibiting dynamin 1 increased the latency time of the first seizure and decreased the frequency and severity of the seizures These results indicate that the altered level of dynamin 1 may contribute to the development of epileptic seizures. |
| 7       | 91          | 752      | Pyruvate dehydrogenase E1 component alpha Subunit (PDHA1) | +3.6        | 8.49/43212.55 | P26284       | 67    | The pyruvate dehydrogenase complex catalyzes the overall conversion of pyruvate to acetyl-CoA and CO <sub>2</sub> , and thereby links the glycolytic pathway to the tricarboxylic cycle.                                                                                                                                                                                                                               |
| 8       | 100         | 986      | Cytochrome c (CYCS)                                       | +3.5        | 9.61/11.5     | P62898       | 57    | Electron carrier protein. Plays a role in apoptosis.                                                                                                                                                                                                                                                                                                                                                                   |
| 9       | 160         | PTZ11    | Calcium and integrin-binding family member 2 (RL10A_RAT)  | +2.1        | 9.94/24.8     | P62907       | 72    | This protein is similar to that of KIP/CIB, calcineurin B, and calmodulin. It is calcium-binding regulatory protein that interacts with DNA-dependent protein kinase catalytic subunits (DNA-PKcs).                                                                                                                                                                                                                    |
| 10      | 93          | 716      | Tubulin beta-2B chain (TBB2B_RAT)                         | +2.3        | 4.78/50       | Q3KRE8       | 185   | Overexpression of the Tubulin beta causes ER stress lead to apoptosis. Mutation and changes of concentration cause seizure and mental retardation due to changing in cell proliferation program.                                                                                                                                                                                                                       |
| 11      | 161         | PTZ12    | Tubulin beta-2C chain                                     | +2.0        | 4.79/49.8     | AAH60597     | 182   | Overexpression of the Tubulin beta causes ER stress lead to apoptosis. Mutation and changes of concentration cause seizure and mental retardation due to changing in cell proliferation program.                                                                                                                                                                                                                       |
| 12      | 162         | PTZ13    | beta-3 tubulin (gi 348529924)                             | +2.1        | 4.82 / 504    | NP_640347    | 180   | Overexpression of the Tubulin beta causes ER stress lead to apoptosis. Mutation and changes of concentration cause seizure and mental retardation due to changing in cell proliferation program.                                                                                                                                                                                                                       |
| 13      | 86          | 801      | Galectin-3 (LEG3_RAT)                                     | +3.1        | 8.59 / 27.2   | P08699       | 157   | Galactose-specific lectin which binds IgE. May mediate with the alpha-3, beta-1 integrin the stimulation by CSPG4 of endothelial cells migration.                                                                                                                                                                                                                                                                      |
| 14      | 2PTZ        | 1543     | Malate dehydrogenase                                      | +2          | 6.16/36.5     | O88989       | 60    | This cytoplasmic enzyme converts malate to pyruvate in glycolysis pathway. (MDH) is an enzyme that reversibly catalyzes the oxidation of malate to oxaloacetate using the reduction of NAD <sup>+</sup> to NADH. Previous studies showed decreasing of the MDH activity in rats that injected by PTZ may be due to reduced expression.                                                                                 |
| 15      | 311         | 311      | Myosin Light Chain 4                                      | +3.6        | 4.96/21.2     | P17209       | 72    | Calcium ion binding protein                                                                                                                                                                                                                                                                                                                                                                                            |

Table S-2: The list of proteins that showed different expression exclusively in Electrical kindling model in comparison with control hippocampus.

| Row no. | Spot number | Match ID | Name                                                         | Fold change | pI/Mw     | Accession no | Score | Function                                                                                                                                                                                                                                                                                                                                                                                                                                                     |
|---------|-------------|----------|--------------------------------------------------------------|-------------|-----------|--------------|-------|--------------------------------------------------------------------------------------------------------------------------------------------------------------------------------------------------------------------------------------------------------------------------------------------------------------------------------------------------------------------------------------------------------------------------------------------------------------|
| 1       | 178         | 1724     | Transcriptional Activator Protein Pur Beta                   | -3.1        | 5.33/33.4 | Q68A21       | 183   | DNA binding transcription factor that have role in cell differentiation.                                                                                                                                                                                                                                                                                                                                                                                     |
| 2       | 178         | 1723     | Nuclear Distribution Protein Nude Homolog 1                  | -2.1        | 5.32/38.5 | Q9ES39       | 98    | Required for centrosome duplication and formation and function of the mitotic spindle.                                                                                                                                                                                                                                                                                                                                                                       |
| 3       | 177         | 1623     | 3-Alpha-Hydroxy steroid Dehydrogenase (3 $\alpha$ -HSD)      | -3.1        | 6.67/37   | P23457       | 92    | the enzyme can accomplish diverse functions: as quinone reductase, as an aromatic alcohol dehydrogenase                                                                                                                                                                                                                                                                                                                                                      |
| 4       | 176         | 1743     | Protein FAM89A                                               | +2.2        | 5.35/18.5 | Q6Q0N2       | 51    | Unknown                                                                                                                                                                                                                                                                                                                                                                                                                                                      |
| 5       | 73          | 1732     | Dihydrolipoamide Acetyltransferase (DLAT)                    | +3.2        | 5.70/58.7 | P08461       | 62    | The pyruvate dehydrogenase complex catalyzes the overall conversion of pyruvate to acetyl-CoA and CO <sub>2</sub> . and thereby links the glycolytic pathway to the tricarboxylic cycle.                                                                                                                                                                                                                                                                     |
| 6       | 173         | 1735     | RNA-binding protein Musashi homolog 1 (MSI1)                 | +2.1        | 7.71/39.1 | Q8K3P4       | 152   | RNA binding protein that regulates the expression of target mRNAs at the translation level. Regulates expression of the NOTCH1 antagonist NUMB. Binds RNA containing the sequence 5'-GUUAGUUAGUUAGUU-3' and other sequences containing the pattern 5'-[GA]U1-3AGU-3'.                                                                                                                                                                                        |
| 7       | 175         | 1724     | Rho GDP-dissociation inhibitor 1 (ARHGDI A)                  | -2.6        | 5.12/23.4 | Q5M9P6       | 86    | It plays an essential role in control of a variety of cellular functions through interactions with Rho family GTPases, including Rac1, Cdc42, and RhoA. RhoGDI is frequently overexpressed in human tumors and chemo-resistant cancer cell lines, raising the possibility that RhoGDI might play a role in the development of drug resistance in cancer cells. It inhibits apoptosis pathway.                                                                |
| 8       | 165         | 1634     | Glutathione S-transferase Mu 1 (GSTM5)                       | +3.1        | 8.42/25.7 | P04905       | 139   | Conjugation of reduced glutathione to a wide number of exogenous and endogenous hydrophobic electrophiles. The olfactory GST may be crucial for the acuity of the olfactory process.                                                                                                                                                                                                                                                                         |
| 9       | 171         | 1624     | D-dopachrome Decarboxylase (DDT)                             | +2          | 6.15/13.0 | P80254       | 75    | Tautomerization of D-dopachrome with decarboxylation to give 5,6-dihydroxyindole (DHI).                                                                                                                                                                                                                                                                                                                                                                      |
| 10      | 174         | 1625     | synapsin-2 (SYN2)                                            | +4.1        | 8.73/63.4 | Q63537       | 69    | Neuronal phosphoprotein that coats synaptic vesicles, binds to the cytoskeleton, and is believed to function in the regulation of neurotransmitter release. May play a role in noradrenaline secretion by sympathetic neurons (By similarity).                                                                                                                                                                                                               |
| 11      | 173         | 1662     | Voltage-dependent anion-selective channel protein 2 (VDAC-2) | +3.2        | 7.44/31.7 | P81155       | 54    | Forms a channel through the mitochondrial outer membrane that allows diffusion of small hydrophilic molecules. The channel adopts an open conformation at low or zero membrane potential and a closed conformation at potentials above 30-40 mV.                                                                                                                                                                                                             |
| 12      | 44          | 1654     | Heat shock 70 kDa protein 1L (HSPAIL)                        | +2.9        | 5.91/70.5 | P55063       | 95    | A cochaperone that organizes other chaperones and heat shock proteins (HSPs). It induced in stressor condition.                                                                                                                                                                                                                                                                                                                                              |
| 13      | 74          |          | Centrosomal protein of 41 kDa (TSGA14 or Cep41)              | -2.1        | 5.44/37   | Q4KM37       | 58    | This protein is essential to glutamylation of the tubulins. Glutamylation defects related to Joubert Syndrome. Mutation of the gene responsible to this protein causes Joubert Syndrome and autism; both of them are nervous system mutagenic disorder. Impaired social interaction and communication, repetitive and stereotyped behavior, congenital ataxia, hypotonia and developmental delay are common events in down regulation or mutation condition. |

Table S-3: The list of proteins that showed different expression exclusively in pilocarpine model in comparison with control hippocampus.

| Row no. | Spot number | Match ID | Name                                                                   | Fold change | pI/Mw       | Accession no | Score | Function                                                                                                                                                                                                                                                                                                                                                                                                                                                                                                                                                           |
|---------|-------------|----------|------------------------------------------------------------------------|-------------|-------------|--------------|-------|--------------------------------------------------------------------------------------------------------------------------------------------------------------------------------------------------------------------------------------------------------------------------------------------------------------------------------------------------------------------------------------------------------------------------------------------------------------------------------------------------------------------------------------------------------------------|
| 1       | 4           | 2529     | ATPase inhibitor                                                       | +2.5        | 9.6/12.2    | Q03344       | 51    | Energy metabolism: inhibition of ATP hydrolyses for maintenance of ATP homeostasis in the conditions that neurons have to use more ATP.                                                                                                                                                                                                                                                                                                                                                                                                                            |
| 2       | 16          | C14      | GTP binding nuclear protein, Alpha tubulin                             | New spot    | 7.01/24.4   | P62828       | 72    | GBP increased in response to the oxidative stress and lead cells to the apoptosis                                                                                                                                                                                                                                                                                                                                                                                                                                                                                  |
| 3       | 45          | 7415     | Rho GDP dissociation inhibitor protects cancer cells against apoptosis | -3.2        | 5.10/23.4   | Q5X173       | 71    | It plays an essential role in control of a variety of cellular functions through interactions with Rho family GTPases, including Rac1, Cdc42, and RhoA. RhoGDI is frequently overexpressed in human tumors and chemo-resistant cancer cell lines, raising the possibility that RhoGDI might play a role in the development of drug resistance in cancer cells. It inhibits apoptosis pathway.                                                                                                                                                                      |
| 3       | 8           | 2441     | Protein-glutamine gama-glutamyl transferase E (TG)                     | +2.7        | 6.46/77.2   | D4A5U3       | 78    | Tissue transglutaminase posttranslationally modifies proteins by transamidation of specific polypeptide bound glutamines (formation of the N6-(L-isoglutamyl)-L-lysine isopeptide, resulting in cross-linking polypeptide chains). TG contributes to the pathology of several neurodegenerative conditions including Alzheimer's disease and Huntington's disease                                                                                                                                                                                                  |
| 4       | 36          | 2522     | Peroxioredoxin-5, mitochondrial                                        | +4.1        | 7.94/22.2   | Q9R063       | 68    | Peroxioredoxin-5 is a member of the peroxiredoxin family of antioxidant enzymes, which reduce hydrogen peroxide and alkyl hydroperoxides. Overexpression of this protein showed activation of defense system in response to harsh oxidative stress.                                                                                                                                                                                                                                                                                                                |
| 5       | 154         | 2539     | Peroxisomal acyl-coenzyme A oxidase 3 (ACOX 3)                         | +2.3        | 8.44/78.4   | Q63448       | 148   | Energy metabolism: Clinical abnormalities include hypotonia, psychomotor retardation, hepatomegaly, facial dysmorphism and seizure resembling those described in peroxisome deficient Zellweger syndrome.                                                                                                                                                                                                                                                                                                                                                          |
| 6       | 25          | 2481     | Regulator of G-protein signaling 7-binding protein (RGS7BP)            | +2.7        | 8.84/28.9   | Q5FVH8       | 45    | RGS proteins are multi-functional, GTPase-accelerating proteins that promote GTP hydrolysis by the alpha subunit of heterotrimeric G proteins, thereby inactivating the G protein and rapidly switching off G protein-coupled receptor signaling pathways.                                                                                                                                                                                                                                                                                                         |
| 7       | 115         | 4PTZ     | Serum albumin                                                          | +4.1        | 6.09/68.7   | P02770       | 51    | Increasing of the serum albumin caused by dysfunction of the blood-brain barrier (BBB) that is a common finding during seizures or following epileptogenic brain injuries, and experimentally induced BBB opening promotes seizures both in naive and epileptic animals.                                                                                                                                                                                                                                                                                           |
| 8       | 1N          | 1N       | Alpha I internexin                                                     | +3.2        | 5.20 / 56.1 | P23565       | 64    | It belongs to NF-L. Alpha I internexin has important role in cell proliferation and differentiation such as other neurofilament.                                                                                                                                                                                                                                                                                                                                                                                                                                   |
| 9       | 40          | 7282     | F-actin-capping protein subunit beta (CAPZB)                           | +2.1        | 5.69/30.6   | Q5X132       | 109   | CAPZB binds to the end of actin filament and cause calcium independent growth of filamentous. Therefore it has a important role in cell shape and growth. It seems CAPZB increasing cause activation of glials that is biomarker of brain injuries such as glial acidic protein and cofilin.                                                                                                                                                                                                                                                                       |
| 10      | 64          | 2708     | Fast kinase domain-containing protein 2 (FASTKD2)                      | +2.5        | 8.88/77.7   | Q5M7V7       | 51    | Fas-activated serine/threonine phosphoprotein (FAST) localized in the mitochondrial inner compartment that inhibits apoptosis by inhibition of TIA-1 promotes increased expression of cIAP and XIAP to inhibit apoptosis. this protein produced in harsh condition and interact with respiratory complex and TIA-1 for modulate the expression of inflammatory mediators. FASTKD family members are essential components of mitochondrial respiration that may modulate the energy balance in cells exposed to adverse conditions of cytochrome c oxidase activity |
| 11      | 74          |          | Centrosomal protein of 41 kDa (TSGA14 or Cep41)                        | -2.1        | 5.44/37     | Q4KM37       | 58    | This protein is essential to glutamylation of the tubulins. Glutamylation defects related to Joubert Syndrome. Mutation of the gene responsible to this protein causes Joubert Syndrome and autism; both of them are nervous system mutagenic disorder. Impaired social interaction and communication, repetitive and stereotyped behavior, congenital ataxia, hypotonia and developmental delay are common events in down regulation or mutation condition.                                                                                                       |

|    |      |      |                                                                     |      |            |        |     |                                                                                                                                                                                                                                                                                                                                                                                                                                |
|----|------|------|---------------------------------------------------------------------|------|------------|--------|-----|--------------------------------------------------------------------------------------------------------------------------------------------------------------------------------------------------------------------------------------------------------------------------------------------------------------------------------------------------------------------------------------------------------------------------------|
| 12 | 34   | 7476 | Brain-enriched Guanylate Kinase-associated Protein (BEGAIN)         | +3.4 | 5.88/67    | O88881 | 53  | BEGAIN is PSD component associated with the core complex of PSD-95/SAP90 and SAPAP. Resulted complex have different domains such as guanylate kinase and SH3 so it can interact with different kind of proteins in different signaling pathway. This complex can interact with NMDA and potassium channel and recruits them in membrane.                                                                                       |
| 13 | 8    | 8    | Protein-L-isoaspartate (D-aspartate) o-methyl transferase           | -2.3 | 7.13/24.6  | P22062 | 61  | Its chaperon that recognizes and catalyzes the repair of damaged L-isoaspartyl and D-aspartatyl groups in proteins. PIMT tends to act on proteins that have been non-enzymatically damaged due to age. By performing this repair mechanism, the enzyme helps to maintain overall protein integrity. Therefore down expression of this cause ER stress lead to the apoptosis.                                                   |
| 14 | 69   | 2650 | Brain specific angiogenesis inhibitor I associated protein (Baiap2) | +3   | 9.10/59.2  | Q6GMN2 | 154 | This protein quenches inhibitor and involved in interaction of angiogenesis (as an cytoplasmic protein) and cell membrane that is important to angiogenesis. Inflammation chronic epilepsy resulting from new blood vessels formation and a weakened blood-brain-barrier (BBB) function. Increasing of angiogenesis showed activation in epileptic brain that approved increasing of other related proteins                    |
| 15 | 43   | 7499 | Phosphorylase b kinase regulatory subunit alpha                     | +3.2 | 5.60/139   | Q64649 | 56  | Its involve in energy metabolism. The enzyme phosphorylase kinase (PhK) activates liver glycogen phosphorylase and brain glycogen phosphorylase in response to neuronal and hormonal stimuli and thus is a key regulatory enzyme in glycogen breakdown. Calcium and other excitatory agents such as acetylcholine (Pi agonist) cause more activity and more expression of this protein (high energy demand of neuronal cells). |
| 16 | 43   | 43   | Calcium and integrin binding family member 2                        | +2.8 | 4.45/21.6  | Q568Z7 | 148 | This protein is similar to that of KIP/CIB, calcineurin B, and calmodulin. It is calcium-binding regulatory protein that interacts with DNA-dependent protein kinase catalytic subunits (DNA-PKcs).                                                                                                                                                                                                                            |
| 17 | 43   | 43   | STE 20/SPS-1 related proline-alanin rich protein kinase             | +3.2 | 5.92/60    | O88506 | 52  | This gene encodes a serine/threonine kinase that is thought to function in the cellular stress response pathway. The kinase is activated in response to hypotonic stress, leading to phosphorylation of several cation-chloride-coupled cotransporters.                                                                                                                                                                        |
| 18 | E7   | E7   | Cell-adhesion molecule-related/down-regulated by Oncogenes (CDON)   | +2.1 | 6.53/136.2 | O35158 | 51  | CDON behaves as a SHH dependence receptor: it actively triggers apoptosis in the absence of SHH. The pro-apoptotic activity of unbound CDON requires a proteolytic cleavage in its intracellular domain, allowing the recruitment and activation of caspase-9                                                                                                                                                                  |
| 19 | 2PTZ | 1543 | Malate dehydrogenase                                                | +2   | 6.16/36.5  | O88989 | 60  | Energy metabolism: Critical enzyme in ATP biosynthesis pathway and Glutamate synthesis as an important excitatory neurotransmitter                                                                                                                                                                                                                                                                                             |
| 20 | 311  | 311  | Myosin Light Chain 4                                                | +3.6 | 4.96/21.2  | P17209 | 72  | Calcium binding protein                                                                                                                                                                                                                                                                                                                                                                                                        |

Table S-4: The list of the 95 differently expressed proteins in epileptic hippocampus.

| Row no. | Spot number | Match ID  | Name                                     | Fold change | pI/Mw     | Accession no | Score | Function                                                                                                                                                                                                                                                                                                                      |
|---------|-------------|-----------|------------------------------------------|-------------|-----------|--------------|-------|-------------------------------------------------------------------------------------------------------------------------------------------------------------------------------------------------------------------------------------------------------------------------------------------------------------------------------|
| 1       | 13          | C13       | Glyceraldehyde-3-phosphate dehydrogenase | +3          | 8.14/35.8 | P04797       | 83    | Energy metabolism: glycolysis enzyme                                                                                                                                                                                                                                                                                          |
| 2       | E9          | 2051/2061 | Growth associated protein 43             | +2.5        | 4.61/23.6 | AAI27503     | 176   | Glutamate can increase expression of Gap43 in excitation conditions and this protein changes releasing of the neurotransmitters                                                                                                                                                                                               |
| 3       | E7          | 2051/2061 | Cysteine deoxygenase type 1 (COD)        | -2.5        | 5.98/23   | P21816       | 52    | COD catalysis the oxidation of l-cysteine to cysteine sulfinic acid. This protein has cell survival role by localization of the DJ-1 protein in mitochondria.                                                                                                                                                                 |
| 4       | 5           | 7581      | Interlukin-22 receptor subunit alpha 2   | +3.5        | 9.19/26.7 | Q7TNI4       | 56    | It binds to inhibitors and antagonists of inflammation pathway so can quench inflammation.                                                                                                                                                                                                                                    |
| 5       | 109         | 1PTZ      | C4-binding protein alpha chain           | New spot    | 7.06/62.2 | Q63514       | 73    | One of the C1 complex members that has main effect on phagocytosis and cause uncontrollable release of the pre-inflammatory agents. Inflammatory and apoptotic effects.                                                                                                                                                       |
| 6       | E10         | 2051/2061 | T-complex protein 1                      | +2.3        | 5.5/59.5  | Q5XIM9       | 60    | A molecular chaperone that consume ATP and fold actin and tubulin. Increasing of this protein demonstrated in schizophrenia.                                                                                                                                                                                                  |
| 7       | 88          | 2581      | Thyroid hormone receptor protein         | New spot    | 6.91/55.1 | P63059       | 151   | Inter nuclear protein binds to Triiodothyronine and cause excitatory status in body such as high blood pressure that take place in seizures.                                                                                                                                                                                  |
| 8       | 54          | C13       | Transgelin-3                             | +3.7        | 6.84/22.5 | P37805       | 133   | It directly binds to P53 and actin and regulates expression of the MMP9 gene. Transgelin is required in agonist-induced smooth muscle contraction and is involved in cell migration. It has tumour suppressive functions in certain cells.                                                                                    |
| 9       | 12          | 2200      | Glutamate synthase (GS)                  | +3          | 6.64/42.3 | P09606       | 97    | This enzyme regulates protein, GABA, osmotic regulations synthesis pathway and its dysfunction cause seizure                                                                                                                                                                                                                  |
| 10      | 9           | MO        | Lactoglutathione lyase (glycoxalase I)   | +2.4        | 5.12/20.8 | Q6P7Q4       | 53    | It is a neuromodulator or chaperone that catalyzes isomerization of the hemithioacetal. High expression of this enzyme increases MG concentration and inhibits of GABA pathway lead to seizure.                                                                                                                               |
| 11      | E8          | 2051/2061 | Neuromodulin                             | +2.5        | 4.61/23.6 | P07936       | 59    | Neuromodulins are neuropeptides or hormones can change releasing of the neurotransmitters so alter speed of transmission through nerves and between them.                                                                                                                                                                     |
| 12      | 106         | 2484      | Tubulin beta-2A chain                    | New         | 4.78/49.9 | P85108       | 148   | Overexpression of the Tubulin beta causes ER stress lead to apoptosis. Mutation and changes of concentration cause seizure and mental retardation due to changing in cell proliferation program.                                                                                                                              |
| 13      | 24          | 23        | Glycolipid transfer protein (GLTP)       | +3.1        | 6.9/23.7  | B0BNM9       | 42    | This protein transmits the glycolipids and not phospholipids between cell membrane and organism membranes so it control cell size in cell cycle and has role in cell proliferation                                                                                                                                            |
| 14      | C5          | 451       | Protein unc-13 homolog A                 | Lost        | 5.1/196   | Q62768       | 52    | It involved in maturation of vesicles so it has important role in neurotransmitter releasing in nervous system                                                                                                                                                                                                                |
| 15      | 19          | 24        | Nucleoside diphosphate kinase B          | +3.2        | 6.9/17.3  | P19804       | 123   | It modulates neuronal cell proliferation, differentiation, and neurite outgrowth. However, a role of NDPK in neurodegenerative diseases has not been reported yet. Its level decreased in patients with Alzheimer's disease (AD) and Down syndrome (DS).                                                                      |
| 16      | 78          | 16        | Peroxioredoxin-6                         | +3          | 5.64/24.8 | O35244       | 150   | This is a ubiquitous family of antioxidant enzymes that also control cytokine-induced peroxide levels and thereby mediate signal transduction in mammalian cells. This protein has been reported to be up-regulated in the kainic acid-induced rat model of CSE, as well as in animal models of amyotrophic lateral sclerosis |
| 17      | 105         | 615       | V-type proton ATPase subunit E1          | +3.5        | 8.44/26.1 | Q6PCU2       | 85    | It is a subunit of V-ATPase so involve in energy metabolism involve in Transferrin endocytosis and recycling, Insulin receptor recycling, Iron uptake                                                                                                                                                                         |

|    |     |      |                                                     |       |           |          |     |                                                                                                                                                                                                                                                                                                                                                              |
|----|-----|------|-----------------------------------------------------|-------|-----------|----------|-----|--------------------------------------------------------------------------------------------------------------------------------------------------------------------------------------------------------------------------------------------------------------------------------------------------------------------------------------------------------------|
|    |     |      |                                                     |       |           |          |     | and transport and Insulin receptor signalling cascade. It reduced in alzheimer's disease.                                                                                                                                                                                                                                                                    |
| 18 | 141 | 1036 | V-type proton ATPase subunit F                      | +3    | 6.10/13.4 | XP645434 | 140 | It is a subunit of V-ATPase so involve in energy metabolism involve in Transferrin endocytosis and recycling, Insulin receptor recycling, Iron uptake and transport and Insulin receptor signalling cascade. It reduced in alzheimer's disease.                                                                                                              |
| 19 | C1  | C1   | Triose phosphate isomerase                          | +4    | 6.89/26.8 | P48500   | 90  | This protein decreased in Electrical and PTZ models (sample C1) showed importance of energy production in Pi model, because Pi treated rats could not eat any food so lost more than 30% of their body weight so ATP production has more importance for them. Therefore enhanced expression of the energy production enzymes is critical in Pi treated rats. |
| 20 | C2  | C1   | CaM kinase-like vesicle-associated protein          | +2.8  | 5.37/54.1 | Q63092   | 57  | It has an important role in transferring and releasing of the neurotransmitters from neurons calcium dependently. Therefore releasing of neurotransmitters faced with problem in down regulated cells.                                                                                                                                                       |
| 21 | 23  | 26C  | Ornithine decarboxylase antizyme 1 (ODC-AZ)         | -3.2  | 6.71/25.2 | P54370   | 61  | Ornithine decarboxylase inhibitor can bind and quench a crucial enzyme in polyamines biosynthesis pathway, Polyamines regulate calcium channel so control calcium dependent releasing of neurotransmitters. Expression of ODC-AZ decreased in alzheimer disease.                                                                                             |
| 22 | 79  | S21  | Voltage dependent anion-selective channel protein 1 | +2.4  | 8.62/30.8 | Q9Z2L0   | 162 | TM (transmembrane) protein located in cell membrane and mitochondrial membrane and has crucial role in controlling of the cell size. It has important role in apoptosis due to transferring of the low molecular weight apoptotic agents (such as ATP, ADP, cytochrome c and etc). Its level changed in Alzheimer's and Down syndrome.                       |
| 23 | 69  | 2650 | Myotrophin                                          | +2.5  | 5.27/12.9 | P62775   | 67  | This protein has a potential function in cerebellar morphogenesis, and it may be involved in the differentiation of cerebellar neurons, particularly of granule cells (it promote differentiation and inhibit cell proliferation). This protein is one of the fundamental proteins in brain development.                                                     |
| 24 | 148 | 856  | Protein DJ-1 (Parkinson-associated protein)         | -4.3  | 6.32/20   | O88767   | 120 | It can bind to the 20s proteasome and inhibit it so can prevent degradation of semi-unfolded proteins. Expression of DJ-1 increase in stressor condition. Mutation of this gene leads to sensitivity to MPTP (oxidant agent) and Parkinson disease.                                                                                                          |
| 25 | 62  | 1342 | AMPA-selective glutamate receptor 2 (GluR2)         | + 3.2 | 7.12/98.7 | P19491.2 | 78  | Receptor for glutamate that functions as ligand-gated ion channel in the central nervous system and plays an important role in excitatory synaptic transmission. L-glutamate acts as an excitatory neurotransmitter at many synapses in the central nervous system.                                                                                          |
| 26 | C   | C1   | Stress induced phosphoprotein 1                     | +3.6  | 6.40/62.6 | O35814   | 192 | A cochaperone that organizes other chaperones and heat shock proteins (HSPs). STIP1 Activates the ALK2-SMAD Signaling Pathways and Promotes Cell Proliferation of Cancer Cells and rescue cells from apoptosis by activation of ERK pathway.                                                                                                                 |
| 27 | 45  | 7415 | Ubiquitin carboxyl-terminal hydrolase L1            | -2.9  | 5.14/24.8 | Q00981   | 54  | In the absence of UCH-L1, synaptic transmission at the neuromuscular junctions (NMJs) is markedly impaired. Both spontaneous and evoked synaptic activities are reduced. Loss of normal UCH-L1 activity lead to neurodegeneration in the central and peripheral nervous system                                                                               |
| 28 | 3   | P11  | Synaptosomal-associated protein (SNAP)              | -2.3  | 4.66/23.3 | P60881   | 105 | This protein plays a pivotal role in regulating synaptic vesicle exocytosis, verbal and performance intelligence quotient, learning, and memory and spatial memory. Inhibition of hippocampal SNAP-25 results in impairment of long-term contextual fear and spatial memories and a decrease in LTP                                                          |
| 29 | 21  | 15   | Cytochrome C oxidase subunit 5a, mitochondrial      | +2.1  | 6.07/16.1 | P11240   | 89  | Mutation in related gene cause strock (seizure disease). Previous studies showed inhibition of respiratory chain enzymes cause seizure.                                                                                                                                                                                                                      |
| 30 | 20  | 15   | ATP synthase subunit alpha, mitochondrial           | +4    | 9.22/59.7 | P15999   | 75  | Energy metabolism: one of the reasons for reduction of ATP is decreasing of the functional ATP synthase may be due to oxidative stress                                                                                                                                                                                                                       |
| 31 | P1  | P1   | Sepiapterin reductase (SPR)                         | -2.5  | 5.55/28.1 | P18297   | 53  | Sepiapterin reductase catalyzes the final step in the                                                                                                                                                                                                                                                                                                        |

|    |     |      |                                                                                   |      |            |        |     |                                                                                                                                                                                                                                                                                                                                                                                                                                                                                                                                                                                        |
|----|-----|------|-----------------------------------------------------------------------------------|------|------------|--------|-----|----------------------------------------------------------------------------------------------------------------------------------------------------------------------------------------------------------------------------------------------------------------------------------------------------------------------------------------------------------------------------------------------------------------------------------------------------------------------------------------------------------------------------------------------------------------------------------------|
|    |     |      |                                                                                   |      |            |        |     | biosynthetic pathway of tetrahydrobiopterin (BH4), an essential cofactor for aromatic amino acid hydrolases including tyrosine hydroxylase, the rate-limiting enzyme in dopamine synthesis. This protein increased in Parkinson Disease.                                                                                                                                                                                                                                                                                                                                               |
| 32 | 1   | 7454 | Stathmin                                                                          | Lost | 5.75/17.3  | P13668 | 128 | Stathmin interacts with two molecules of dimeric $\alpha,\beta$ -tubulin to form a tight ternary complex called the T2S complex. Mice without stathmin have deficiency in innate and learned fear. They lack motivation for retrieving pups and are unable to choose a safe location for nest-building.                                                                                                                                                                                                                                                                                |
| 33 | 1   | 7454 | Dynactin subunit 2                                                                | -3.2 | 5.14/44.14 | Q6AYH5 | 46  | This complex plays a critical role in cell division and the transport of materials within cells. The dynactin complex, dynein, and microtubules work together like a conveyer belt to move materials within cells. At least five mutations in related gene have been found cause Perry syndrome.                                                                                                                                                                                                                                                                                       |
| 34 | 30  | 2127 | Clathrin light chain A                                                            | -2.5 | 4.41/26.9  | P08081 | 94  | Clathrin is a major coat protein involved in sorting and retention of proteins at the late Golgi and in endocytosis from the cell surface. Decreased expression of this protein interrupted releasing of the neurotransmitter and rescuing of their receptors so interrupted all downstream process (Alzheimer).                                                                                                                                                                                                                                                                       |
| 35 | 105 | 2400 | Heat shock cognate 71 kDa (HSP 70)                                                | +3.8 | 5.37/70.9  | P63018 | 129 | Induction of heat shock/stress proteins is a key feature of a universal mechanism of cellular defense to injury known as the "stress response" specially in oxidative stress condition (we approved oxidative stress in epilepsy before).                                                                                                                                                                                                                                                                                                                                              |
| 36 | 56  | 2386 | Carbonic anhydrase (CA)                                                           | Lost | 6.89/29.11 | P27139 | 117 | CA II plays an important role in the production of CSF and regulation of its pH and ionic constituents. This enzyme required for pH balancing and low expression of that can cause long lasting seizures.                                                                                                                                                                                                                                                                                                                                                                              |
| 37 | 163 | 163  | NADH dehydrogenase [ubiquinone] 1 alpha subcomplex subunit 5                      | +3.1 | 6.84/13.4  | Q63362 | 76  | Energy metabolism: its deficiency is associated with a wide variety of clinical signs and symptoms such as weak, loss of eye assign, seizure, brain retardation and behavioral disorders.                                                                                                                                                                                                                                                                                                                                                                                              |
| 38 | 74  | 2413 | Ubiquitin carboxyl-terminal hydrolase isozyme L1 (UCH-L1)                         | -2.6 | 5.14/24.8  | Q00981 | 54  | In the absence of UCH-L1, synaptic transmission at the neuromuscular junctions (NMJs) is markedly impaired. Both spontaneous and evoked synaptic activities are reduced. Loss of normal UCH-L1 activity lead to neurodegeneration in the central and peripheral nervous system                                                                                                                                                                                                                                                                                                         |
| 39 | 159 | C7   | Brain acid soluble protein 1 (BASP1)                                              | +2.0 | 4.48/21.8  | Q05175 | 51  | It is one of the fundamental proteins that has role in Brain developing. The most striking property of <i>BASP1</i> is its potential to block the initiation of Myc-induced cell transformation.                                                                                                                                                                                                                                                                                                                                                                                       |
| 40 | C8  | C8   | Calmodulin                                                                        | +2.1 | 4.09/16.8  | P62161 | 56  | Calmodulin (CaM) is a ubiquitous, calcium-binding protein that can bind to and regulate a multitude of different protein targets, thereby affecting many different cellular functions. CaM mediates processes such as inflammation, metabolism, apoptosis, muscle contraction, intracellular movement, short-term and long-term memory, nerve growth and the immune response. Note that calcium concentration increase in seizure. Calmodulin modulates numerous $Ca^{2+}$ -dependent enzymes and participates in relevant cellular functions such as hyperexcitability and apoptosis. |
| 41 | 25  | 2481 | ADP-ribosyl cyclase 1 (ADPRC1)                                                    | +3.2 | 8.83/34.4  | Q64244 | 53  | ADPRC 1 catalyzes production of Cyclic ADP-ribose from $NAD^+$ that is one of the main inducers for accumulation of calcium in cytoplasm.                                                                                                                                                                                                                                                                                                                                                                                                                                              |
| 42 | 50  | 2633 | Calcineurin subunit b type 1 (Protein phosphatase 2B regulatory subunit 1 or CaN) | +2.6 | 4.64/19.3  | P63100 | 74  | Calcineurin (CaN) is a ubiquitous $Ca^{2+}$ -calmodulin (CaM)-dependent protein phosphatase that has been shown to regulate the activity of ion channels, glutamate release and synaptic plasticity. CsA and FK-506 (CaN inhibitors) have been shown to inhibit the progression of kindling in a reversible manner, suggesting that CaN may play an essential role in epileptogenesis in the kindling model.                                                                                                                                                                           |
| 43 | 131 | 2238 | Gamma-enolase, also known as enolase 2 (ENO2) or neuron specific enolase (NSE)    | +1.8 | 5.03/47.1  | P07323 | 73  | Energy metabolism: Enolase involved in the glycolysis. Its indicator of neurodegeneration and has been used to assess the primary injury as well as to predict outcome after various brain-damaging conditions. It increases after single seizure and SE.                                                                                                                                                                                                                                                                                                                              |
| 44 | 70  | 2692 | Ubiquitin-conjugating enzyme                                                      | -2.1 | 6.13/17.1  | Q9EQX9 | 62  | This enzyme decides to living and dead of protein                                                                                                                                                                                                                                                                                                                                                                                                                                                                                                                                      |



|    |     |      |                                                                                   |      |           |        |     |                                                                                                                                                                                                                                                                                                                                                                                                                        |
|----|-----|------|-----------------------------------------------------------------------------------|------|-----------|--------|-----|------------------------------------------------------------------------------------------------------------------------------------------------------------------------------------------------------------------------------------------------------------------------------------------------------------------------------------------------------------------------------------------------------------------------|
|    |     |      | E2                                                                                |      |           |        |     | and its concentration increase in harsh and stress condition. this enzyme increased in neurodegenerative disease such as Alzheimer so its controlling is a potentially treatment for this ailment.                                                                                                                                                                                                                     |
| 45 | 104 | 2238 | Dynamin-1                                                                         | +1.5 | 6.44/97.3 | P21575 | 54  | High expression of this protein may be manifested increasing of the neurotransmitters (excitatory) releasing in epileptic models. The behavioral study revealed that inhibiting dynamin 1 increased the latency time of the first seizure and decreased the frequency and severity of the seizures These results indicate that the altered level of dynamin 1 may contribute to the development of epileptic seizures. |
| 46 | 3N  | 3N   | Creatine kinase B-type (B-CK)specific CK in brain tissue                          | +2.3 | 5.39/42.7 | P07335 | 63  | Involved in rapid energy production that need in seizure. Previous studies showed deficiency for creatine kinase is increasing calcium removal rate from the hippocampal cells so decreased seizure probability in PTZ treated rats.                                                                                                                                                                                   |
| 47 | 2N  | 2N   | Calreticulin (calregulin, CRP55, CaBP3, ERp60)                                    | +2.4 | 4.33/48   | P18418 | 54  | Calreticulin is involved with maintaining adequate calcium levels in organisms (major Ca <sup>2+</sup> -binding (storage) protein in the lumen of the endoplasmic reticulum). Increasing of this protein is in agreement with increasing of the other calcium binding protein and calcium concentration in epileptic rats                                                                                              |
| 48 | 5N  | 5N   | Protein Disulfide isomerase                                                       | lost | 5.88/56.6 | P11598 | 53  | PDIs contribute to the pathogenesis of many neurodegenerative disorders including Alzheimer's disease, Parkinson's disease and Huntington's disease. Accumulation of unfolded proteins in ER causes a condition that called ER-stress lead to the apoptosis and finally neurodegeneration.                                                                                                                             |
| 49 | 42  | 42   | Clathrin light chain B                                                            | -2.0 | 4.56/25.1 | P08082 | 57  | Decreased expression of this protein interrupted releasing of the neurotransmitter and rescuing of the their receptors so interrupted all downstream process                                                                                                                                                                                                                                                           |
| 50 | 10  | 7637 | Hemoglobin subunit alpha-1                                                        | +3.1 | 7.81/15.3 | P01946 | 52  | Brain hemoglobin has role in storage of oxygen to provide a homeostatic mechanism in anoxic conditions, which is especially important for A9 DA neurons that have an elevated metabolism with a high requirement for energy production. Increasing of this protein in hippocampus tissue showed oxygen demand in epileptic brain is more than control.                                                                 |
| 51 | 19  | 24   | Cofilin-1                                                                         | +2.6 | 8.22/18.5 | P45592 | 90  | It depolymerizes filamentous F-actin and inhibits the polymerization G-actin. Therefore increasing of the Cofilin-1 cause depolymerization of the filamentous actin and affected dendritic structure and function and lead dysfunction of neurotransmitters trafficking in the cell.                                                                                                                                   |
| 52 | 17  | 17   | Growth factor receptor-bound protein 2 (Grb2 or Gab 2)                            | -3.5 | 5.89/25.2 | P62994 | 110 | Contains the SH3 and SH2 domains so can bind to phosphotyrosine in Ras signal transduction pathway. This protein increases cell proliferation by mediated of MEK and SOS pathways.                                                                                                                                                                                                                                     |
| 53 | E10 | E10  | Neuromodulin                                                                      | +2.1 | 4.61/23.6 | P07936 | 152 | Neuromodulins are neuropeptides or hormones can change releasing of the neurotransmitters so alter speed of transmission through nerves and between them.                                                                                                                                                                                                                                                              |
| 54 | 33  | 7449 | Lactoylglutathione lyase (glyoxalase I)                                           | +2.2 | 5.12/20.8 | Q6P7Q4 | 101 | It is a neuromodulator or chaperone that catalyzes isomerization of the hemithioacetal. It detoxifies methyl glyoxalate (2-oxo aldehyde). High expression of this enzyme increased MG concentration and inhibition of GABA pathway lead to seizure                                                                                                                                                                     |
| 55 | 6   | 7562 | Calcineurin subunit b type 1 (Protein phosphatase 2B regulatory subunit 1 or CaN) | +3.1 | 4.64/19.3 | P63100 | 63  | Calcineurin (CaN) is a ubiquitous Ca <sup>2+</sup> -calmodulin (CaM)-dependent protein phosphatase that has been shown to regulate the activity of ion channels, glutamate release and synaptic plasticity. CsA and FK-506 (CaN inhibitors) have been shown to inhibit the progression of kindling in a reversible manner, suggesting that CaN may play an essential role in epileptogenesis in the kindling model.    |
| 56 | 18  | 18   | Nucleoside diphosphate kinase A                                                   | +2.7 | 5.94/17.2 | Q05982 | 56  | It modulates neuronal cell proliferation, differentiation, and neurite outgrowth. However, a                                                                                                                                                                                                                                                                                                                           |

|    |     |      |                                                    |      |           |              |     |                                                                                                                                                                                                                                                                                                                                                                                                                                                                                                                         |
|----|-----|------|----------------------------------------------------|------|-----------|--------------|-----|-------------------------------------------------------------------------------------------------------------------------------------------------------------------------------------------------------------------------------------------------------------------------------------------------------------------------------------------------------------------------------------------------------------------------------------------------------------------------------------------------------------------------|
|    |     |      |                                                    |      |           |              |     | role of NDPK in neurodegenerative diseases has not been reported yet. Its level decreased in patients with Alzheimer's disease (AD) and Down syndrome (DS)                                                                                                                                                                                                                                                                                                                                                              |
| 57 | 102 | 355  | Vimentin                                           | +2.6 | 5.05/53.7 | P31000       | 171 | Vimentin is a kind of intermediate filament that expresses in immature astrocytes. Prolonged seizure activity markedly increases neurogenesis in the dentate gyrus of adult rats and that newly born dentate granule cells contribute to hippocampal network reorganization in the pilocarpine model of temporal lobe epilepsy. PCNA, an independent marker of mitotic activity,                                                                                                                                        |
| 58 | 156 | P16  | Astrocytic phosphoprotein PEA-15                   | +2.5 | 4.93/15   | Q5U318       | 59  | Expression of PEA-15 oscillates throughout the cell cycle, and the loss of PEA15 accelerates cell cycle progression. It induced by injuries. Previous studies showed seizures increased its expression in CA1 and CA3 about 1.95 and 2.17 fold respectively than control.                                                                                                                                                                                                                                               |
| 59 | 64  | 2708 | Peptidyl-prolyl isomerase A                        | -2.2 | 8.34/17.9 | P10111       | 52  | In Alzheimer's disease, the peptidyl prolyl isomerase Pin1 binds to phospho-Thr231 on Tau proteins and, hence, is found within degenerating neurons, where it is associated to the large amounts of abnormally phosphorylated Tau proteins. Pin1 can regulate tau oligomerization so it is one of the possibly same events that take place in epilepsy and Alzheimer's disease or other neurodegenerative disease.                                                                                                      |
| 60 | 52  | 2717 | Septin-9 isoform 3                                 | +1.8 | 7.67/38.6 | NP_001106969 | 58  | The septins are an evolutionarily conserved family of Phosphoserine proteins involved in diverse processes including vesicle trafficking, apoptosis, remodelling of the cytoskeleton, infection, neurodegeneration, and neoplasia. Upregulation of this protein cause neuronal migration.                                                                                                                                                                                                                               |
| 61 | C10 | C10  | Tumor necrosis factor ligand superfamily member 11 | +2.5 | 8.22/35.4 | Q9ESE2       | 38  | This protein was shown to be a dentritic cell survival factor. A number of studies in animal models indicate that seizures induce TNF expression in the brain. Up-regulating of TNF in hippocampus of epileptic rats than controls approved neurodegeneration condition (neuroinflammation) in 3 models.                                                                                                                                                                                                                |
| 62 | 94  | 732  | MCM domain-containing protein 2                    | +1.8 | 8.07/76   | Q5XI14       | 48  | MCM domain-containing proteins are Helicases have major roles in genome maintenance by unwinding structured nucleic acids. They are important for genomic stability and cellular homeostasis, it seems over expression of them has a compensational role due to increasing of the DNA damages during epileptogenesis (approved by our previous studies).                                                                                                                                                                |
| 63 | 119 | 16   | Phosphoglycerate mutase 1 (PGAM1)                  | +3.2 | 6.67/28.8 | P25113       | 64  | It catalyzes the interconversion of 3-phosphoglycerate and 2-phosphoglycerate during glycolysis. It has been reported that this enzyme is commonly upregulated in many human cancers and other conditions that energy demand increases. PGAM1 plays an important role in coordinating glycolysis.                                                                                                                                                                                                                       |
| 64 | 112 | 272  | 60 kDa heat shock protein, mitochondrial           | +3.7 | 5.91/61   | P63039       | 123 | The mitochondrial chaperonin Hsp60 is a ubiquitous molecule with multiple roles, constitutively expressed and inducible by oxidative stress (approved previously). Neuronal excitability can be affected by mitochondrial alterations such as depletion of ATP, generation of ROS, elevated oxidative stress, disruption of Ca <sup>2+</sup> homeostasis, dysregulation of excitotoxicity, and alterations in biosynthesis and metabolism of neurotransmitters, all of these conditions stimulate HSP60 overexpression. |
| 65 | 75  | 75   | Lysophosphatidic acid receptor 3 (LPAr3)           | +3.0 | 9.49/40.3 | Q8K5E0       | 54  | Previously reported LPA binds to receptor in the hippocampus and increases intracellular Ca <sup>2+</sup> ion                                                                                                                                                                                                                                                                                                                                                                                                           |

|    |     |      |                                                                             |      |           |            |     |                                                                                                                                                                                                                                                                                                                                                                                                                                                                                                                                                                                                                                                                                                          |
|----|-----|------|-----------------------------------------------------------------------------|------|-----------|------------|-----|----------------------------------------------------------------------------------------------------------------------------------------------------------------------------------------------------------------------------------------------------------------------------------------------------------------------------------------------------------------------------------------------------------------------------------------------------------------------------------------------------------------------------------------------------------------------------------------------------------------------------------------------------------------------------------------------------------|
|    |     |      |                                                                             |      |           |            |     | levels. They have suggested that LPA may elevate the extracellular glutamate concentration, thereby stimulating AMPA/kainate receptors, and in turn, alleviating the Mg <sup>2+</sup> block of the NMDA receptor, which finally leads to glutamate stimulation of calcium influx via NMDA receptors. They further showed that LPA induces necrosis and apoptosis in cultured primary hippocampal neurons. Previous study showed supraspinal pretreatment with LPA1 and LPA3 antagonists (VPC12249 or VPC32183) protects KA-induced neuronal cell death in the hippocampal CA3 region, suggesting that hippocampal LPA1 and LPA3 appear to be involved in KA-induced hippocampal CA3 neuronal cell death. |
| 66 | 35  | 7399 | Malate dehydrogenase (MDH), cytoplasmic                                     | -2.3 | 6.16/36.5 | O88989     | 53  | This cytoplasmic enzyme converts malate to pyruvate in glycolysis pathway. (MDH) is an enzyme that reversibly catalyzes the oxidation of malate to oxaloacetate using the reduction of NAD <sup>+</sup> to NADH. Previous studies showed decreasing of the MDH activity in rats that injected by PTZ may be due to reduced expression.                                                                                                                                                                                                                                                                                                                                                                   |
| 67 | 97  | 751  | Glyceraldehyde-3-phosphate dehydrogenase (GAPDH)                            | +3.2 | 8.14/35.8 | P04797     | 51  | Glyceraldehyde-3-phosphate dehydrogenase (GAPDH), long considered a traditional glycolytic protein. When this enzyme migrates to nucleus act as a transcription factor and lead to apoptosis. Expression of this protein increased in neurodegenerative disease and its localization changed also. GAPDH can produce protein aggregates specially after oxidative changes therefore more expression may lead to amyloid fibrils that cause neurodegeneration                                                                                                                                                                                                                                             |
| 68 | 119 | 16   | Phosphoglycerate mutase I (PGM)                                             | +2.5 | 6.67/28.8 | P25113     | 64  | Its very susceptible to oxidative damages. Nonfunctional oxidized form of phosphoglycerate mutase I can produce protein aggregates (Alzheimer disease) due to more sensitivity of this protein therefore more expression may lead to aggregate structures that cause neurodegeneration. 2DE results showed phosphoglycerate mutase expression increased in mouse cobalt focus seizure.                                                                                                                                                                                                                                                                                                                   |
| 69 | 164 | 152  | Glial fibrillary acidic protein (GFAP)                                      | +3.4 | 5.35/49.9 | P47819     | 208 | Increased expression of glial fibrillary acidic protein (GFAP) represents astroglial activation and gliosis during neurodegeneration. GFAP considered a marker protein for astrogliosis in other words its biomarker of neurotoxicity.                                                                                                                                                                                                                                                                                                                                                                                                                                                                   |
| 70 | 168 | 168  | Protein kinase C and casein kinase substrate in neurons protein 1 (PACSI 1) | -3.3 | 5.15/50.4 | Q9Z0W5     | 76  | It plays a central role in synaptic vesicle recycling (clathrin-mediated endocytosis and participate in membrane dynamics) and interacts with huntingtin via its C-terminal SH3 domain. PACSIN1 also acts as a Tau-binding partner in regulating microtubule dynamics and is required for axonal plasticity.                                                                                                                                                                                                                                                                                                                                                                                             |
| 71 | 152 | 653  | Mitochondrial ornithine transporter 2                                       | -4.2 | 9.10/30   | A0A0G2K309 | 52  | There are some similarities between HHH (deficiency of this protein) and epilepsy may be due to same involving transporter in mitochondria. It seems main transporters and proteins in mitochondria and also structure of mitochondrial membrane disturbed in epileptogenesis specially in status epilepticus of Pilocarpine model.                                                                                                                                                                                                                                                                                                                                                                      |
| 72 | 139 | 997  | Parvalbumin alpha (PV)                                                      | -3.2 | 5.00/12   | P02625     | 89  | PV has efficient Ca <sup>2+</sup> buffering effect and its high concentration in PV-expressing nonpyramidal cells is a prerequisite for the proficient inhibition of cortical networks (due to decreasing free or active Ca <sup>2+</sup> in the cells). Previous studies showed PV deficient mice are very sensitive to PTZ injection. Decreased PV expression was found in PV+ GABAergic interneurons in schizophrenia.                                                                                                                                                                                                                                                                                |
| 73 | N8  | N8   | β-synuclein                                                                 | -2.8 | 4.48/14.5 | Q63754     | 97  | β-synuclein inhibits α-synuclein aggregation by facilitation of interactions of α-synuclein with fatty acids in the membrane. β-synuclein may play a                                                                                                                                                                                                                                                                                                                                                                                                                                                                                                                                                     |

|    |     |      |                                                |      |             |              |     |                                                                                                                                                                                                                                                                                                                                                                                   |
|----|-----|------|------------------------------------------------|------|-------------|--------------|-----|-----------------------------------------------------------------------------------------------------------------------------------------------------------------------------------------------------------------------------------------------------------------------------------------------------------------------------------------------------------------------------------|
|    |     |      |                                                |      |             |              |     | important role in neuroprotection by regulation of Akt signaling pathway (survival pathway). It has antioxidant effect also.                                                                                                                                                                                                                                                      |
| 74 | 60  | 2615 | Hem-binding protein                            | +3.4 | 5.05/14.7   | NP_001102121 | 63  | This protein is one member of peroxiredoxin family so has antioxidant properties. Free hem and free iron cause oxidative damages. Increasing of hem-binding protein in our study showed activation of a compensation pathway against oxidative damages that created by convulsant methods (pilocarpine, PTZ and electrical shock).                                                |
| 75 | C6  |      | Caveolin-1 (Cav1)                              | -3.8 | 5.30/20.5   | P41350       | 53  | Previous studies showed in mice, one of the reasons for age-related synapse degradation is the age-related decline in the expression of the cholesterol-binding protein caveolin 1 (Cav1). This process accelerates in neurodegenerative diseases, such as Alzheimer's and Parkinson's. Cav 1 has a important role in neuroplasticity and neurotransmitter release.               |
| 76 | 1N  | 1N   | Alpha internexin                               | -3.1 | 5.20/56.1   | P23565       | 64  | Alpha internexin accumulates around the amyloid fibers in Alzheimer's Disease so it's possible A-internexin plays a role in the neuronal alterations associated with B-amyloid plaque formation in Alzheimer's disease. Previous studies showed it increased in Pilocarpine model.                                                                                                |
| 77 | 80  | 2345 | superoxide dismutase (SOD)                     | +4.3 | 8.96/24.7   | P07895       | 54  | Previous results showed oxidative stress that lead to increased activity of SOD in epileptic patients, chemical models and also knockout animal. In the KA induction model there is an increase in ROS production and mitochondrial dysfunction.                                                                                                                                  |
| 78 | 70  | 2650 | Endophilin-B2                                  | +2.3 | 5.44 / 44.8 | Q5PPJ9       | 88  | Endophilin is expressed at presynaptic terminals and is involved in clathrin-coated vesicle-mediated endocytosis by binding to the endocytosis- related proteins synaptojanin and dynamin via its SH3 domain (uptake of released neurotransmitter). It increases BBB leakage.                                                                                                     |
| 79 | 34  | 7476 | S100 calcium binding protein A3                | +3.1 | 4.86/12.6   | EDM00546     | 61  | It can bind to calcium ion. Several molecules produced by the activation of the NFκB pathway can directly or indirectly result in intracellular Ca <sup>2+</sup> release.                                                                                                                                                                                                         |
| 80 | 37  | 6851 | Neurofilament light polypeptide (NF-L)         | +2.8 | 4.62/61.3   | P19527       | 153 | Neurofilament light chain (NF-L), a component of the axonal cytoskeleton, has been shown to be elevated in the cerebrospinal fluid of patients with many types of axonal injury. Northern blotting analysis showed its expression increased in progressive myoclonus epilepsy. It's a biomarker for axonal injuries like glial acidic protein that increases in neuronal damages. |
| 81 | 135 | 415  | Proteasome 26S protease regulatory subunit 10B | -3.1 | 7.64/45.8   | NP_001093979 | 90  | Less expression of proteasome complex cause diminished protease activity in cells lead accumulation of aggregates in ER and ER stress that cause apoptosis.                                                                                                                                                                                                                       |
| 82 | 34  | 7476 | N-acetyl-D-glucosamine kinase (NAGK)           | +4.1 | 5.56/37.2   | P81799       | 87  | It is a key salvage enzyme that is involved in mammalian amino-sugar metabolism. This protein is multifunctional agent: 1. enzymatic activity (phosphorylation of GlcNAc) and 2. structural function (producing new branches in dendrites)                                                                                                                                        |
| 83 | 158 | 816  | Cyclin-H                                       | +2.9 | 6.68/37.6   | Q9R1A0       | 52  | Its survival condition protein that increased in stress condition. The cyclin H/cdk7/Mat1 complex is found either in a free state or as a part of the transcription factor complex TFIIH.                                                                                                                                                                                         |
| 84 | 69  | 2650 | Reticulocalbin-2 (RCN2)                        | -3.1 | 4.27/37.4   | Q62703       | 126 | Reticulocalbin 2 is a calcium-binding protein located in the lumen of the ER. The protein contains six conserved regions with similarity to a high affinity Ca <sup>2+</sup> -binding motif, the EF-hand. It inhibited calcineurin signaling pathway (our results showed overexpression of calcineurin) by reduction free calcium ion.                                            |
| 85 | 123 | 1027 | Transmembrane protein 165                      | -2.1 | 6.97/34.8   | Q4V899       | 53  | May function as a calcium/proton transporter                                                                                                                                                                                                                                                                                                                                      |

|    |     |      |                                                        |      |            |             |     |                                                                                                                                                                                                                                                                                                                      |
|----|-----|------|--------------------------------------------------------|------|------------|-------------|-----|----------------------------------------------------------------------------------------------------------------------------------------------------------------------------------------------------------------------------------------------------------------------------------------------------------------------|
|    |     |      |                                                        |      |            |             |     | involved in calcium and in lysosomal pH homeostasis. Deficiency of this gene causes a complex congenital disease that accompanied with unexplained fever episodes and transient epilepsy.                                                                                                                            |
| 86 | 124 | 1124 | mitogen-activated protein kinase 14 (P38 MAP Kinase)   | +2.1 | 5.60/41.4  | NP_112282.2 | 85  | Induces apoptosis by mediation of caspase 3 and 9.                                                                                                                                                                                                                                                                   |
| 87 | 64  | 2708 | Alpha-tubulin N-acetyl transferase                     | -1.8 | 9.82/47.3  | Q6MG11      | 54  | Acetylation of the e-amino group of K40 in a-tubulin is one of different modifications that are highly conserved in ciliated organisms. These changes can destabilize cytoskeletal.                                                                                                                                  |
| 88 | 126 | 778  | Profilin-1                                             | +3.2 | 8.46/15    | P62963      | 78  | Profilin is an actin-binding protein involved in the dynamic turnover and restructuring of the actin cytoskeleton.<br>This restructuring of the actin cytoskeleton is essential for processes such as organ development, wound healing, and the hunting down of infectious intruders by cells of the immune system   |
| 89 | 126 | 778  | Hepatoma derived growth factor (HDGF)                  | +2.4 | 4.78/26.5  | Q8VHK7      | 54  | HDGF can be found in a broad range of tissues, with highest levels in brain, lung and spleen. The expression of HDGF and HRP-3 was found to be regulated during brain development. It cause expansion of axon.                                                                                                       |
| 90 | 64  | 2708 | Glutamate [NMDA] receptor subunit epsilon-1            | +3.8 | 6.59/165   | Q00959      | 167 | Glutamate is the principal excitatory neurotransmitter in the brain and, as such, it inevitably plays a role in the initiation and spread of seizure activity. It also plays a critical role in epileptogenesis. It is a specific channel for calcium ion.                                                           |
| 91 | 31  | 3210 | Cytochrome b-c1 complex subunit Rieske (mitochondrial) | +3.1 | 9.04/29.4  | P20788      | 94  | Mitochondrial cytochrome bc1 complex (complex III) a multifunctional membrane protein complex that catalyzes electron transfer from ubiquinol to cytochrome c but also is involved in proton translocation, peptide processing and superoxide generation                                                             |
| 92 | 47  | 7474 | Synaptic vesicle membrane protein vat-1                | +2.9 | 6.17/43.1  | Q3MIE4      | 134 | Synaptic vesicles are responsible for regulating the storage and release of neurotransmitters in the nerve terminal. <i>by</i> considering the effects of increasing the calcium current and increased VAT-1 expression its possible releasing of the acetylcholine in hippocampus improved in epileptic rat models. |
| 93 | E7  | E7   | Ornithine decarboxylase                                | +1.8 | 5.21/51    | P09057      | 61  | Ornithine decarboxylase inhibitor can bind and quench a crucial enzyme in polyamines biosynthesis pathway. Polyamines regulate calcium channel so control calcium dependent releasing of neurotransmitters. Expression of ODC-AZ decreased in alzheimer disease.                                                     |
| 94 | 4   | 2529 | Aromatic-L-amino-acid decarboxylase                    | -4.2 | 6.51/54    | P14173      | 84  | Dopamine synthesis                                                                                                                                                                                                                                                                                                   |
| 95 | 167 | 167  | Glutamate receptor 1 (GluR1)                           | +2.7 | 7.46 / 101 | P19490      | 68  | Glutamate receptor and calcium channel                                                                                                                                                                                                                                                                               |

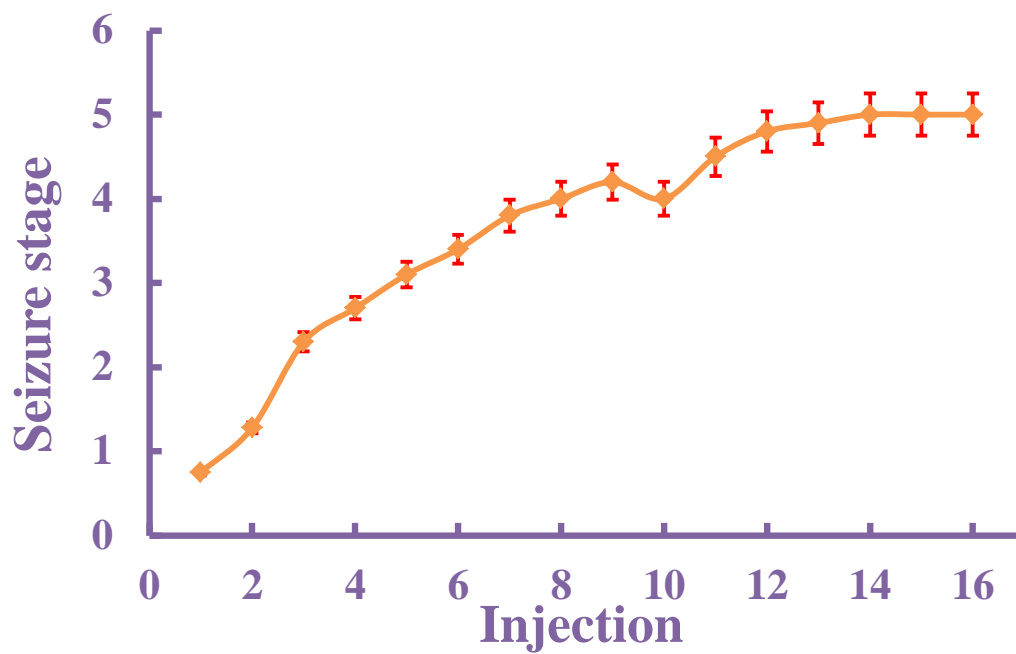

Figure S-1: seizure progressive curve in PTZ kindling model. A high proportion of rats (over 95 %) reached full kindling criterion (3 consecutive stages 4 or 5) by a total of 16 PTZ injections (35 mg/kg).

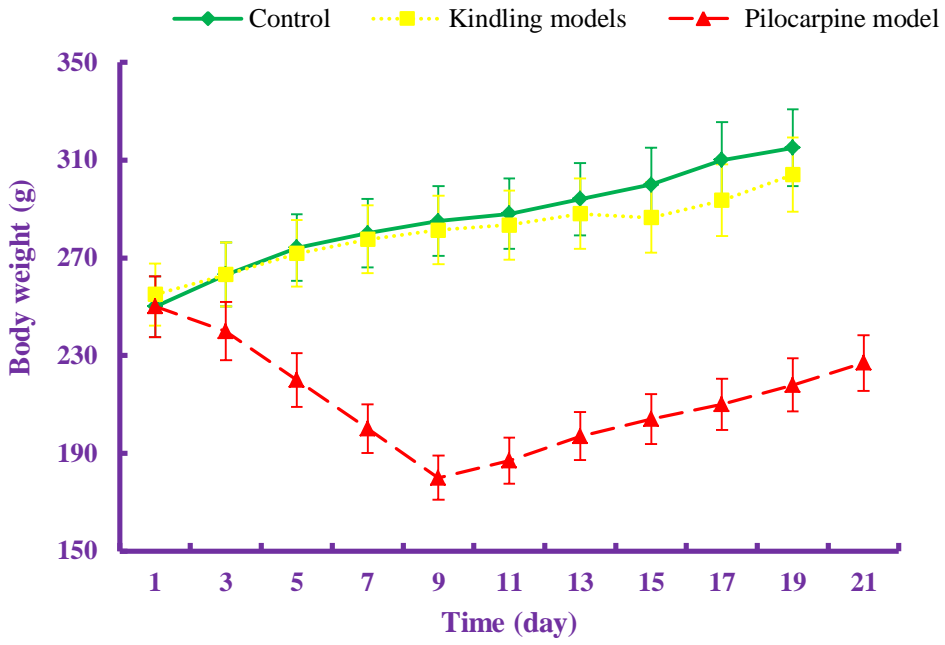

Figure S-2: Fluctuation of body weight in kindling and non-kindling (pilocarpine) model during experiment.

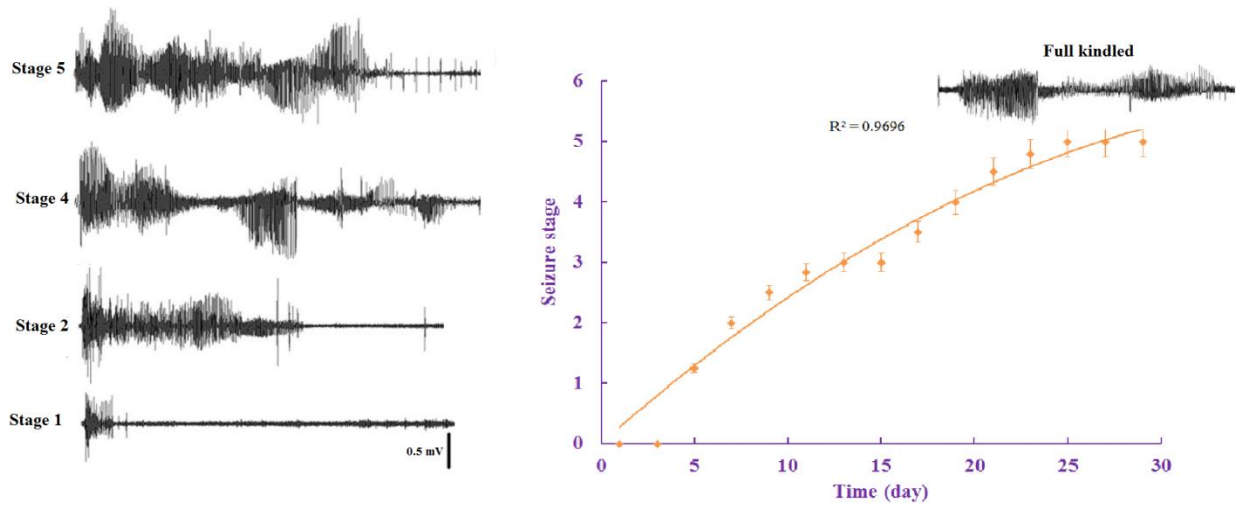

Figure S-3: Electrical kindling progress curve in rat model. The left panel shows after discharges recorded from amygdala of rats during kindling.



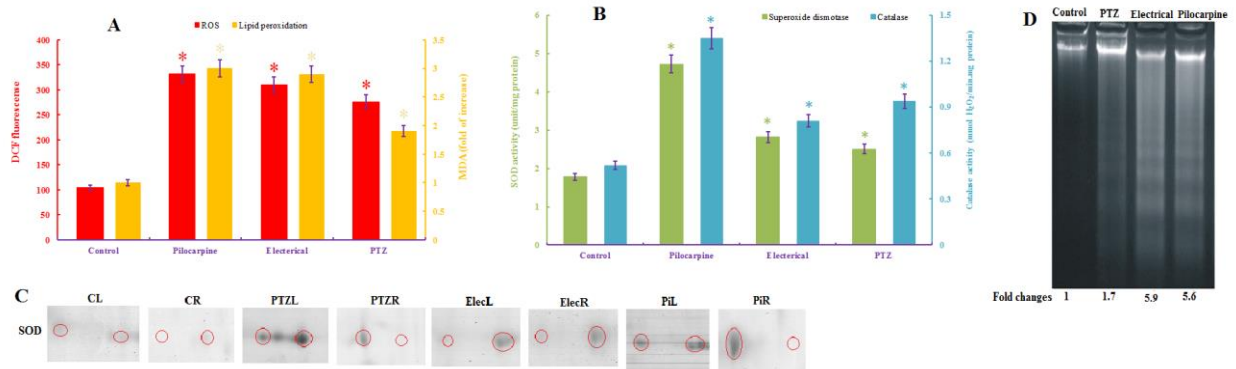

Figure S-4. Oxidative stress evaluation in epileptic rats. A) DCF fluorescence results showed ROS levels in control and epileptic rats and MDA content showed increased lipid peroxidation in epileptic rats. B) SOD and catalase activity measurements in control and three model of epilepsy showed increased activity of them that accompanied by up-expression of SOD based on proteomics data (C). Asterisk symbols showed significant changes by  $P < 0.05$ . D) Gel electrophoresis of genomic DNA extracted from hippocampus tissues of control and epileptic rats. Fold changes of intensity between 100 to 150 bp fragments for each sample compared with control were showed below the gel image.

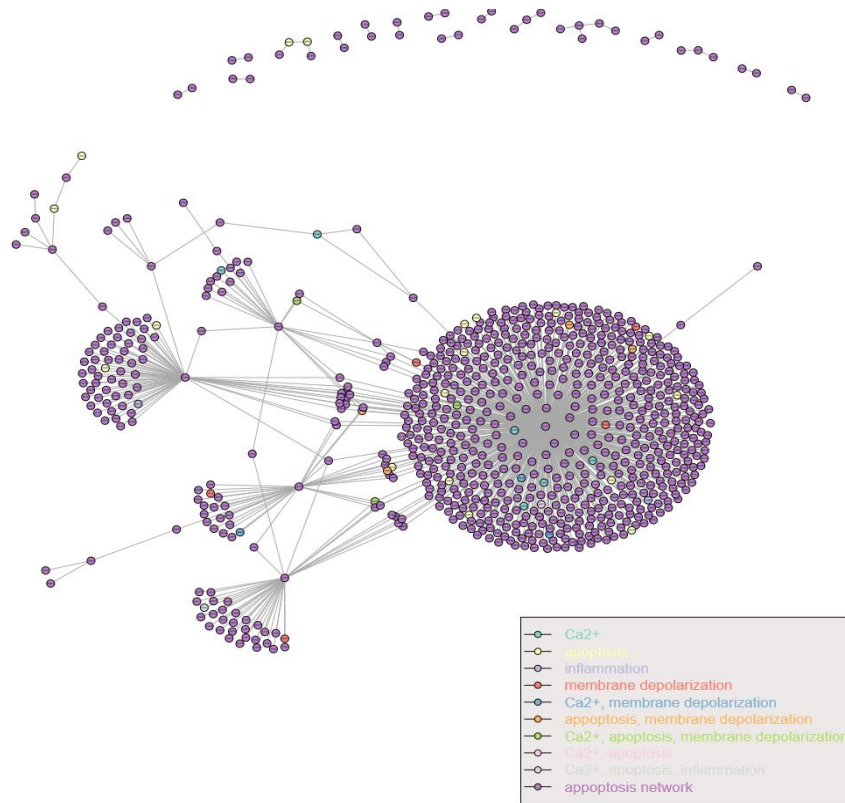

Figure S-5: Network analysis based on Uniprot data base shows our detected proteins (changed expressed proteins in epileptic rats) have important role in calcium homeostasis network.

Figure S-6: original images related to immunohistochemistry to local study of the ADPRC, calreticuline, SNAP 25 and UCH-L1 in hippocampus of control and epileptic rats.

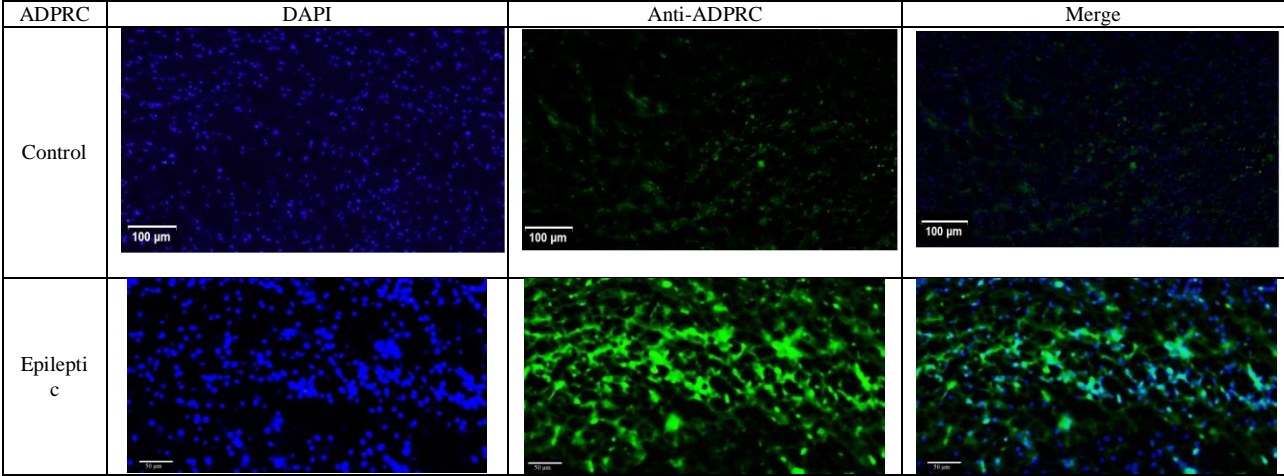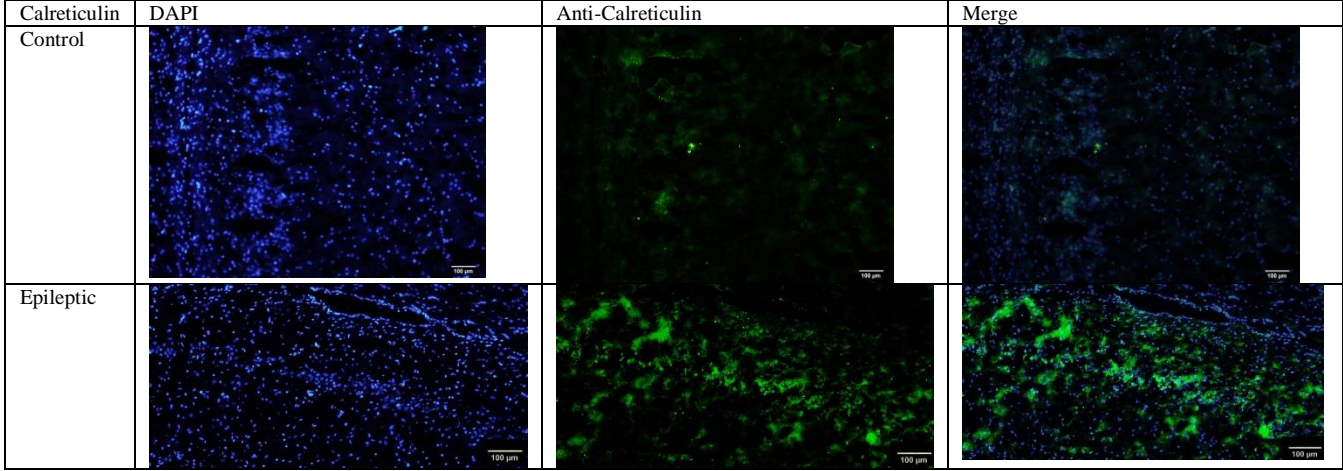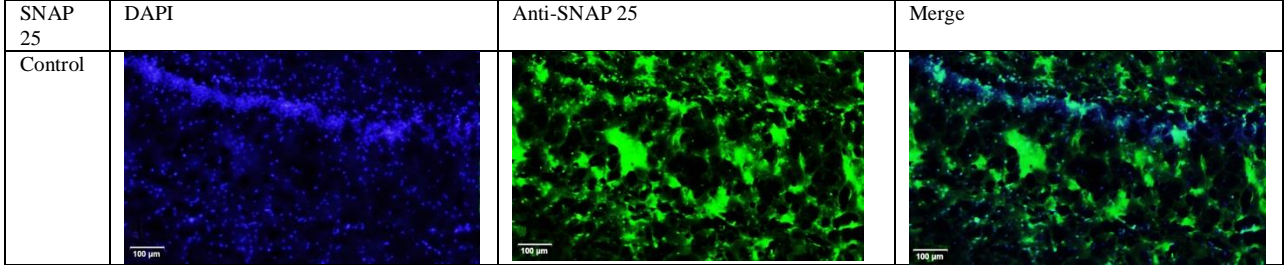

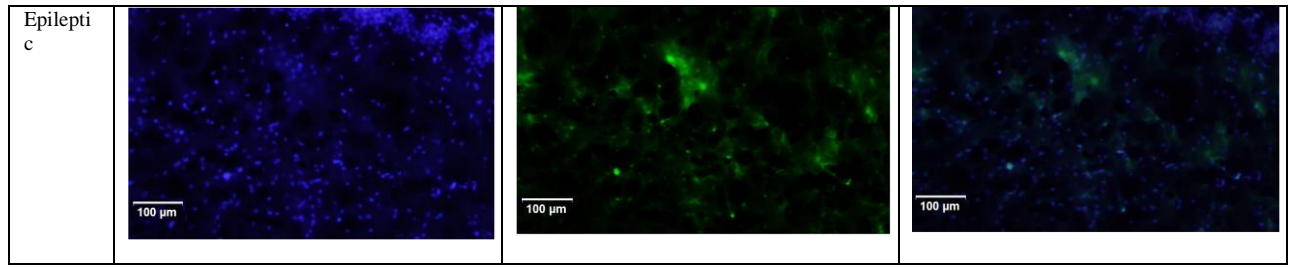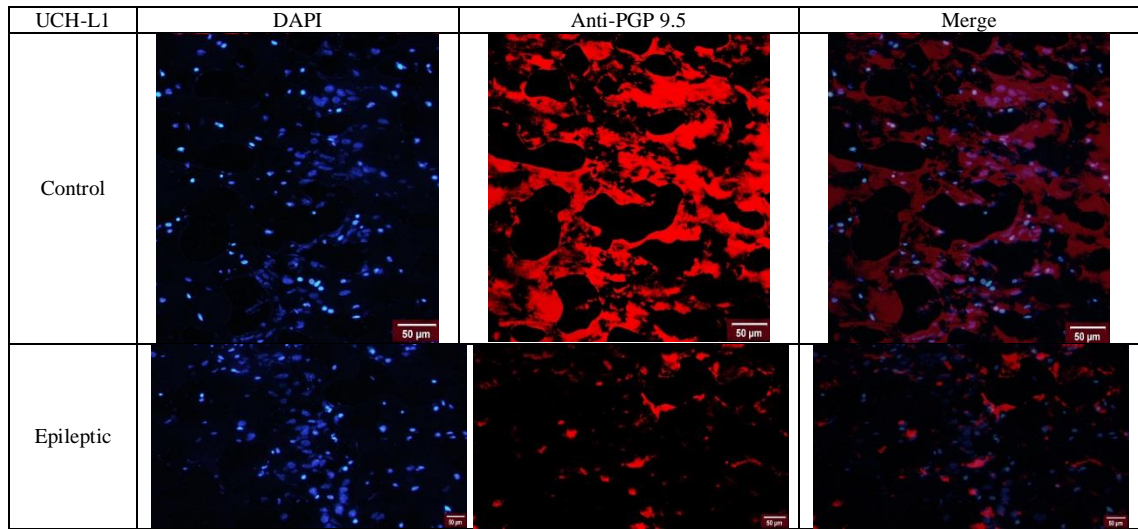

Figure S-7: Original images related to 2-DE gels in experimental rats (epileptic and control).

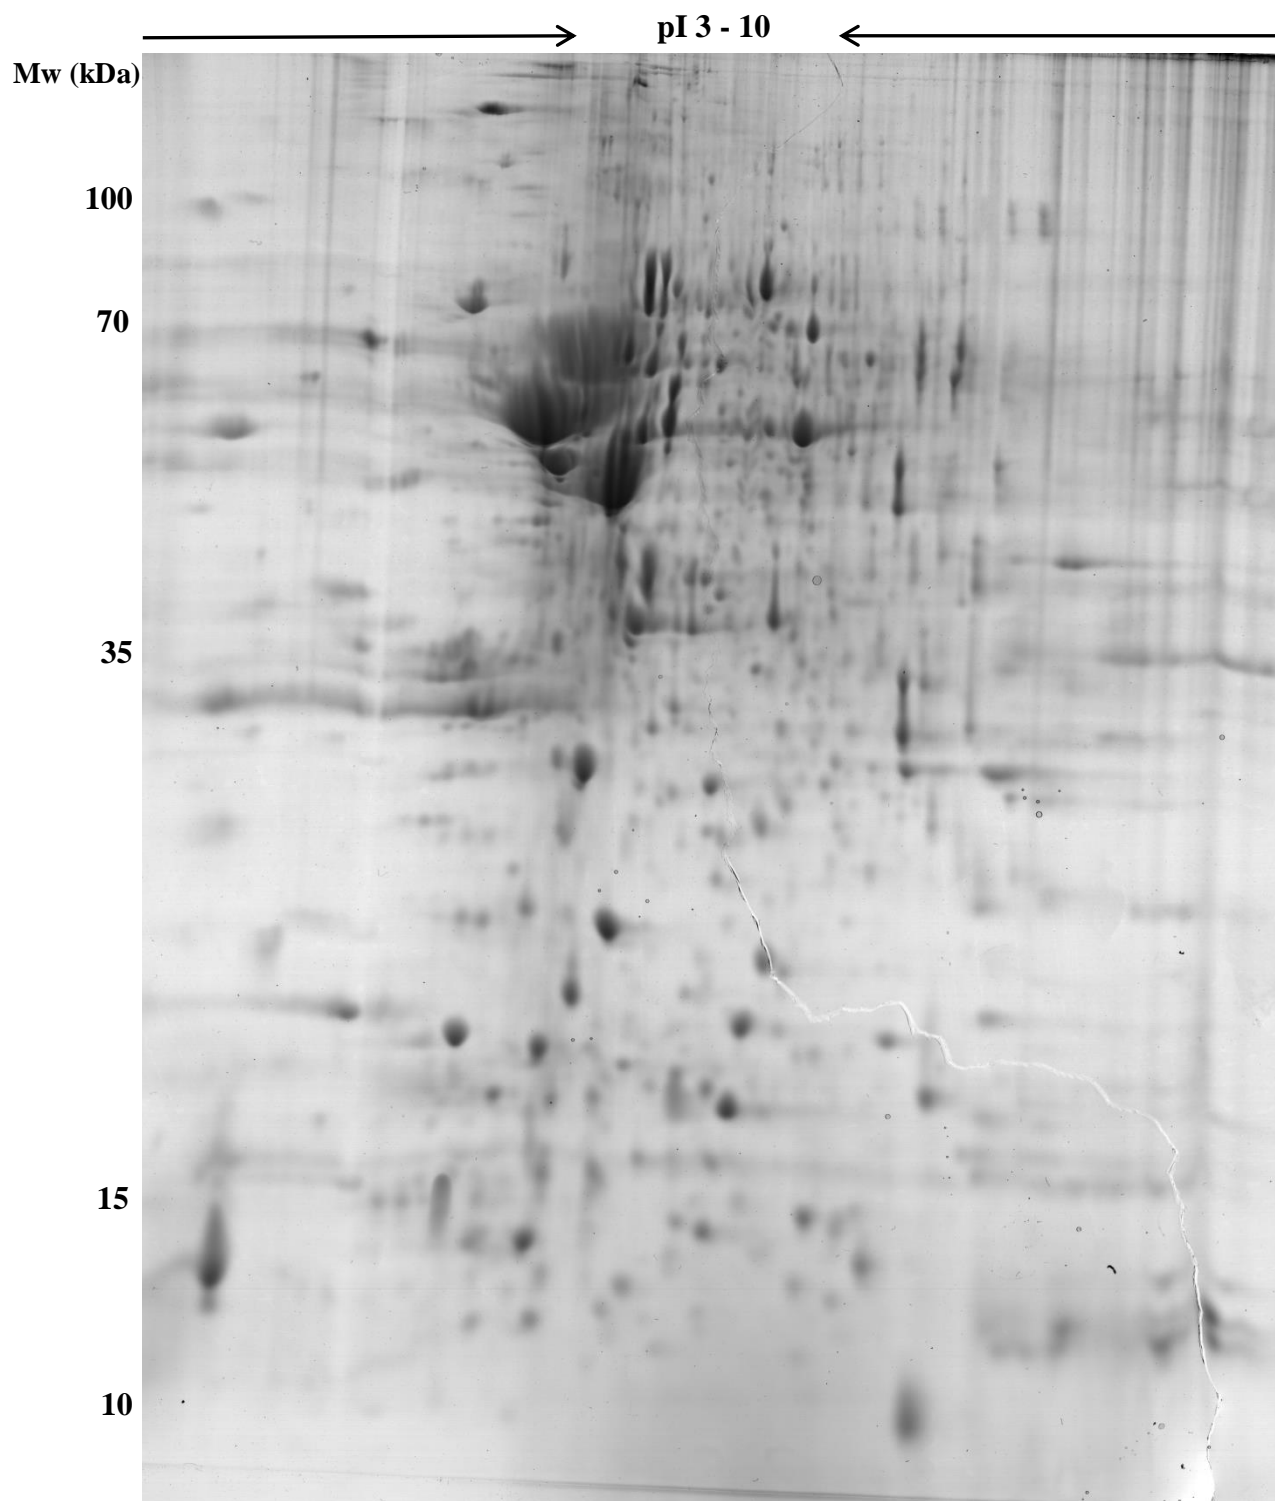

A1: 2-DE gel related to left hippocampus from control rats.



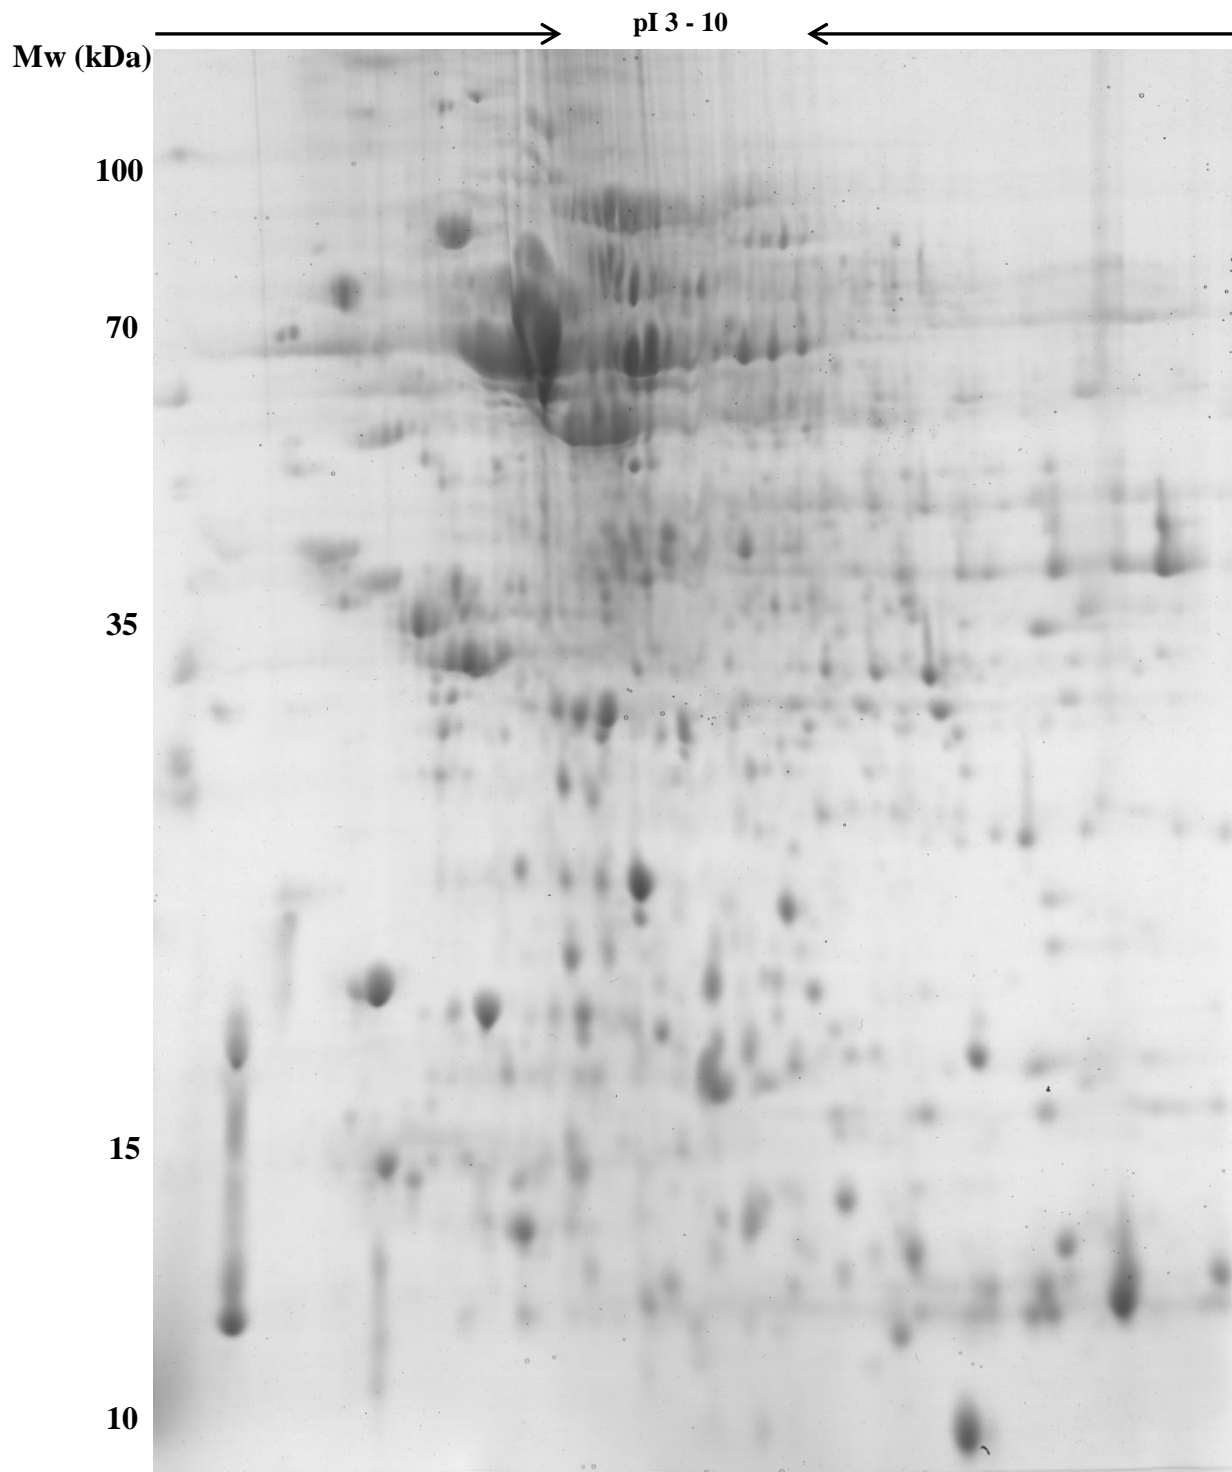

A2: 2-DE gel related to right hippocampus from control rats.

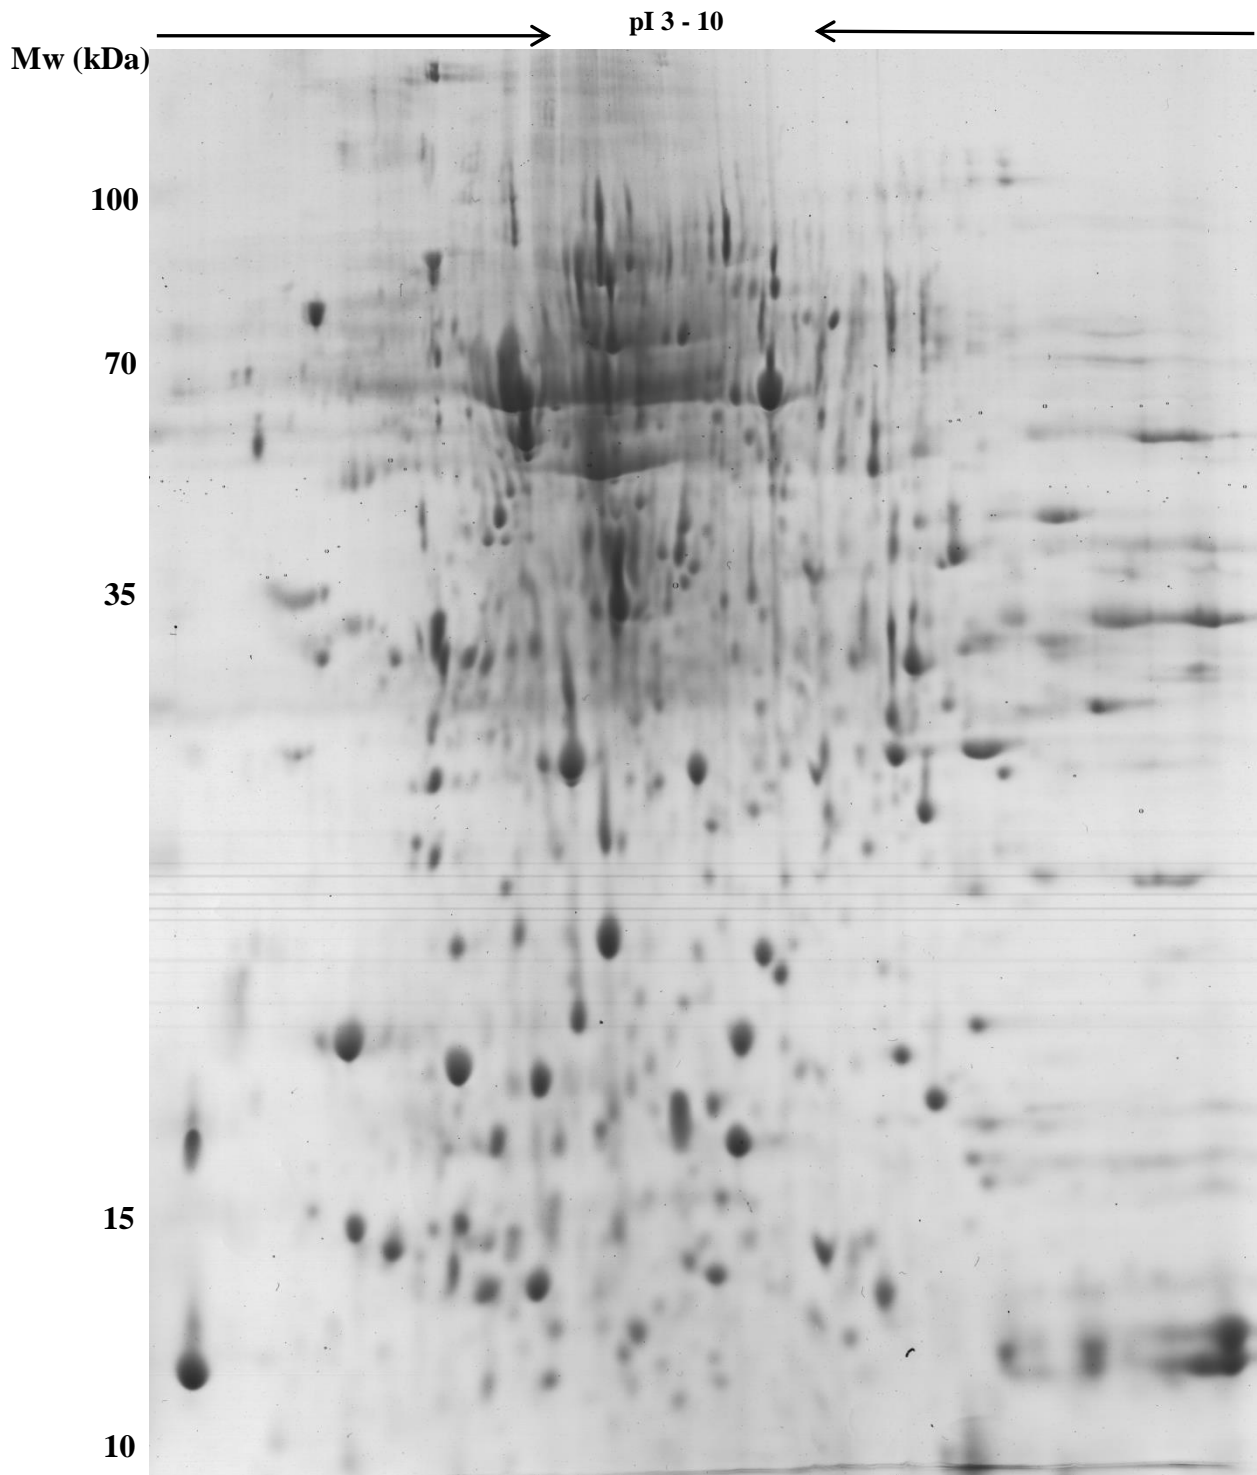

B1: 2-DE gel related to left hippocampus from pilocarpine model of epilepsy.

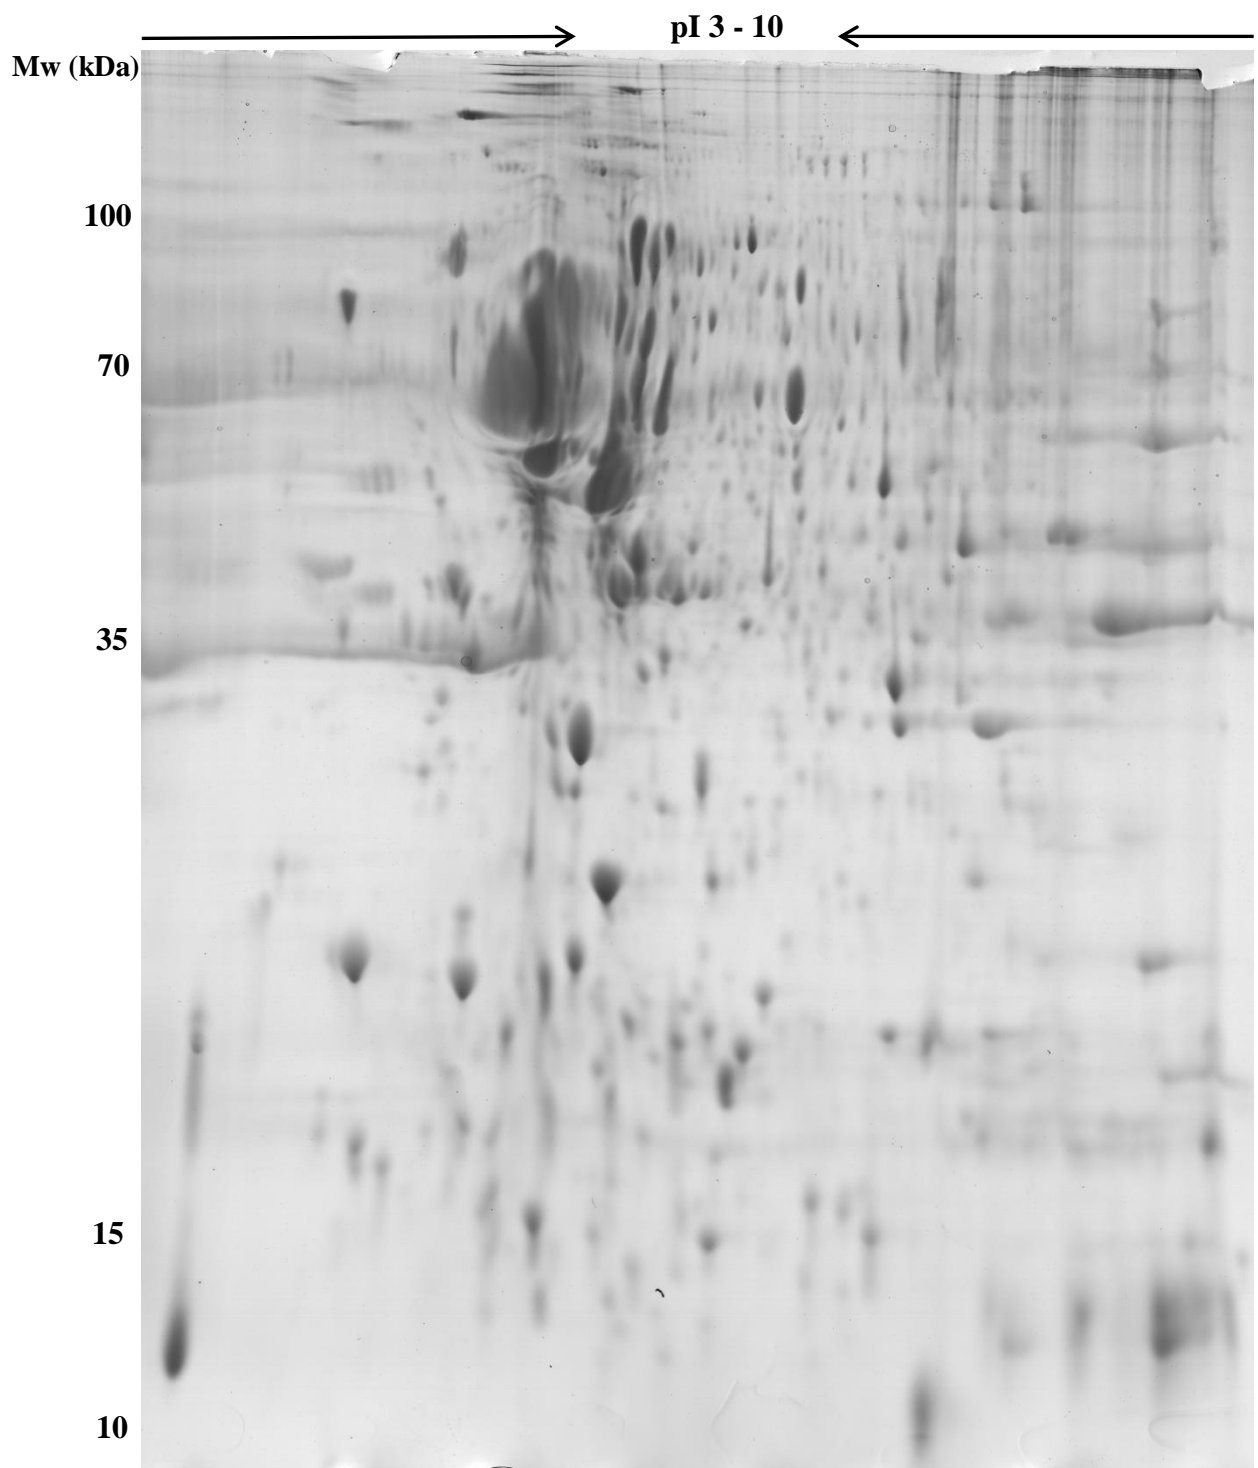

B2: 2-DE gel related to right hippocampus from pilocarpine model of epilepsy.



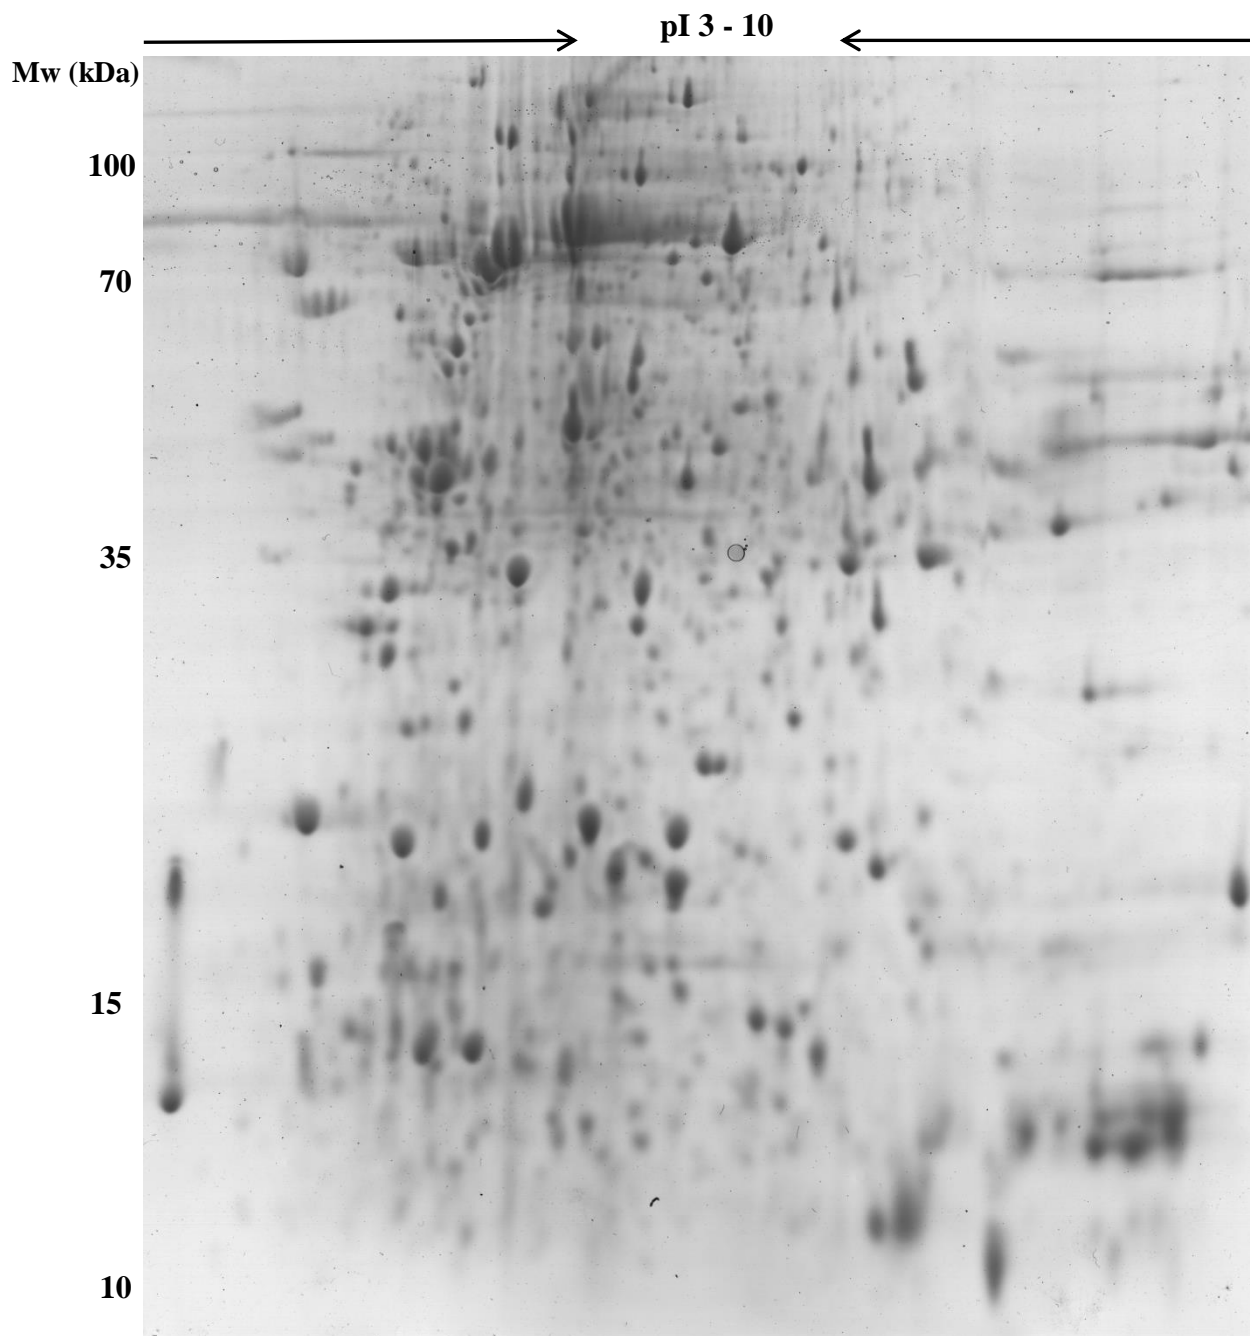

C1: 2-DE gel related to left hippocampus from PTZ kindling model of epilepsy.

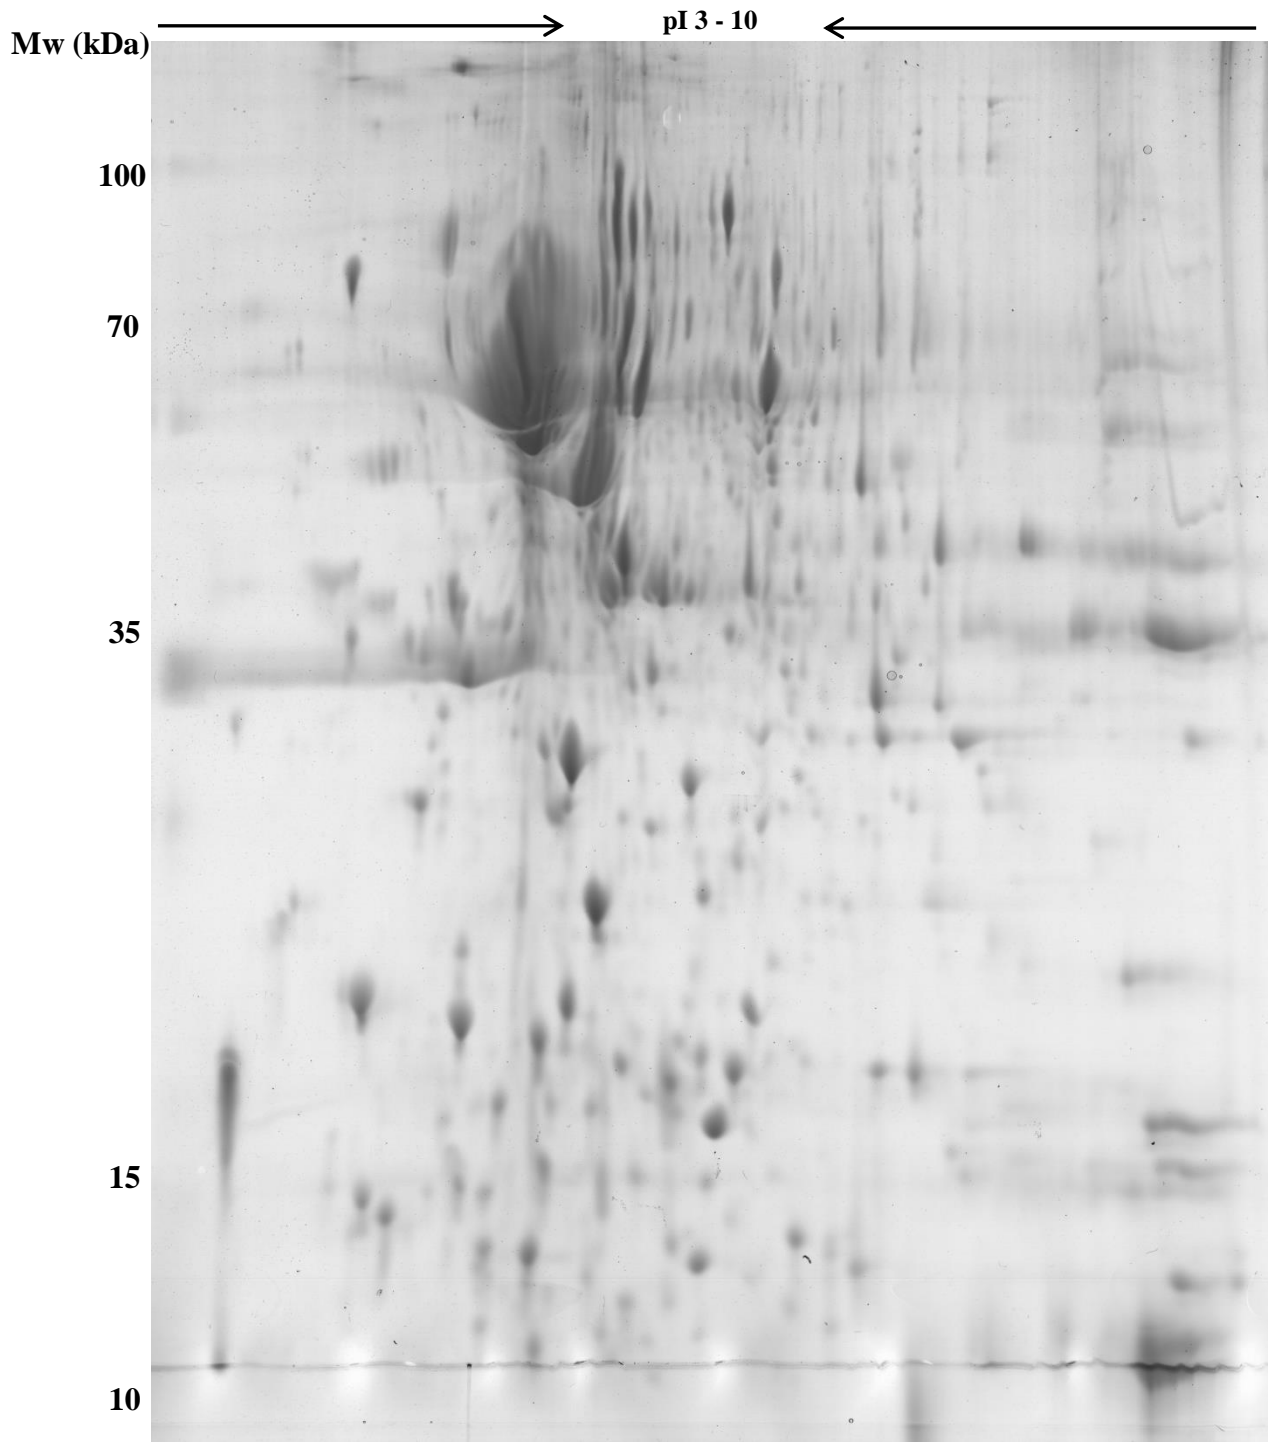

C2: 2-DE gel related to right hippocampus from PTZ kindling model of epilepsy.

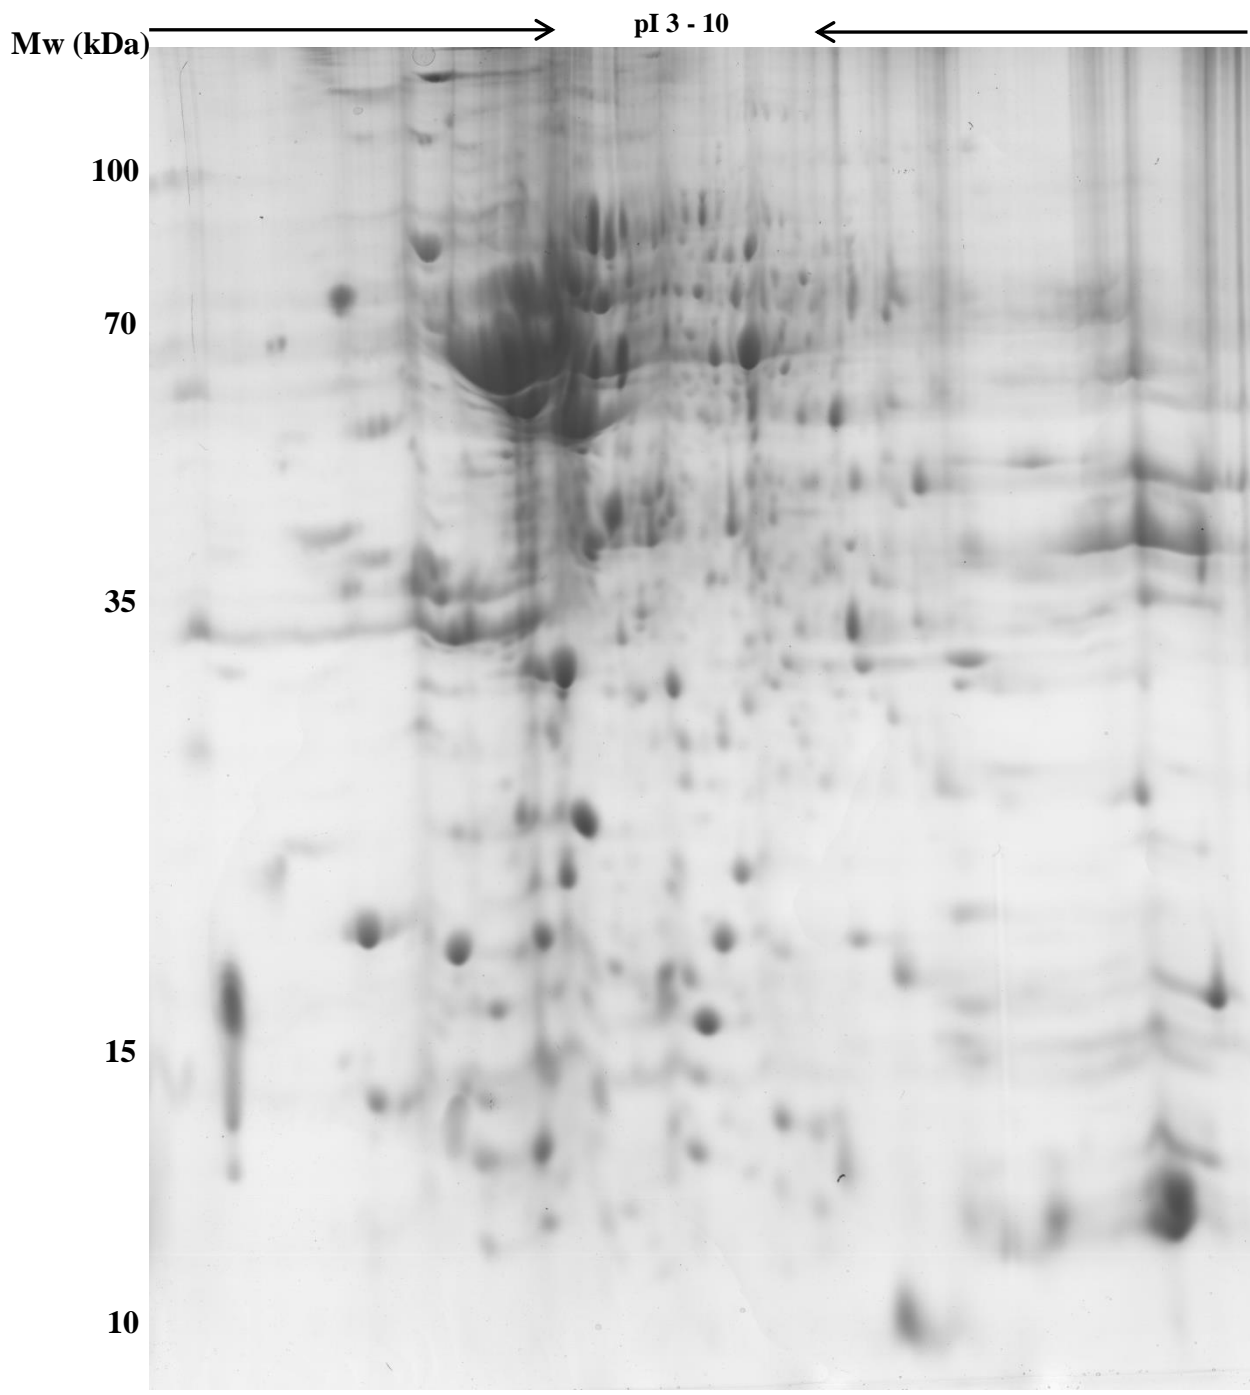

D1: 2-DE gel related to left hippocampus from electrical kindling model of epilepsy.

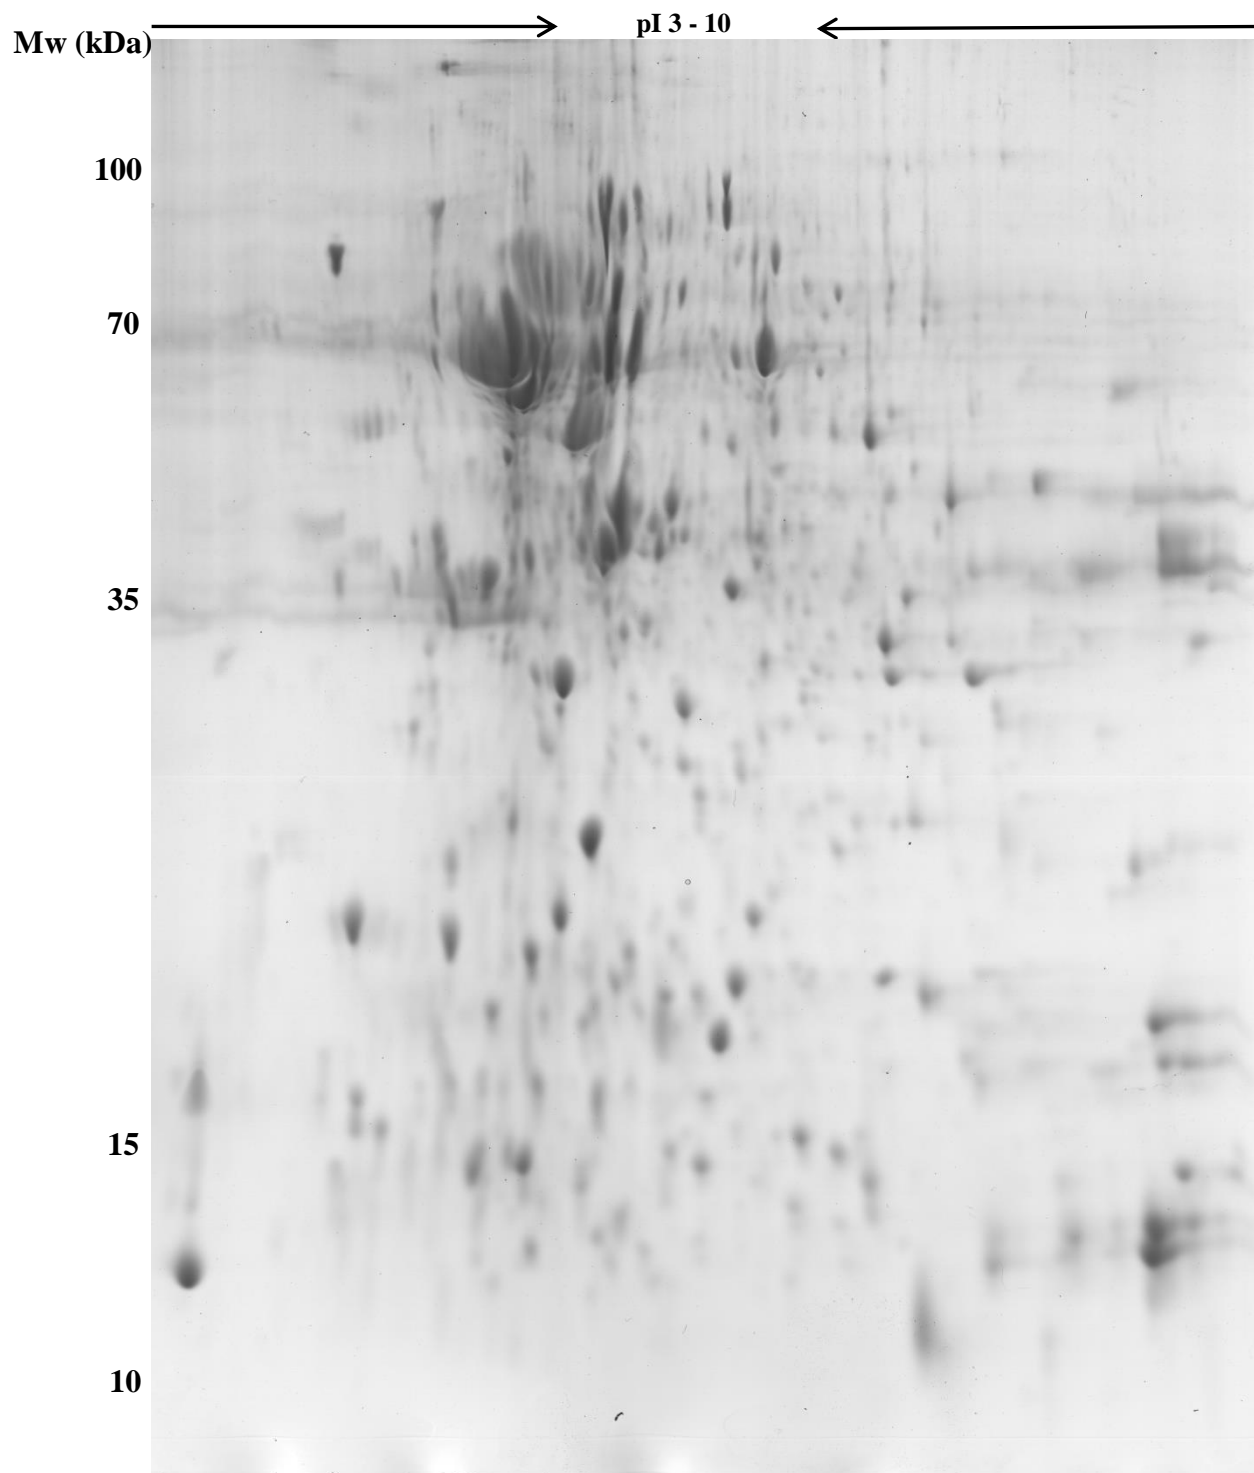

D2: 2-DE gel related to right hippocampus from electrical kindling model of epilepsy.
